1 **SARS-CoV-2 hijacks neutralizing dimeric IgA for enhanced nasal infection**  
2 **and injury**

3  
4 Biao Zhou<sup>1,2,11</sup>, Runhong Zhou<sup>1,2,11</sup>, Jasper Fuk-Woo Chan<sup>2,3,4,5,11</sup>, Jianwei Zeng<sup>6,11</sup>, Qi  
5 Zhang<sup>7,11</sup>, Shuofeng Yuan<sup>2,3,4,11</sup>, Li Liu<sup>1,2,11</sup>, Rémy Robinot<sup>8,11</sup>, Sisi Shan<sup>7</sup>, Jiwan Ge<sup>6</sup>, Hugo  
6 Yat-Hei Kwong<sup>1</sup>, Dongyan Zhou<sup>1,2</sup>, Haoran Xu<sup>1,2</sup>, Chris Chung-Sing Chan<sup>2,3</sup>, Vincent Kwok-  
7 Man Poon<sup>2,3</sup>, Hin Chu<sup>2,3,4</sup>, Ming Yue<sup>9</sup>, Ka-Yi Kwan<sup>1</sup>, Chun-Yin Chan<sup>1</sup>, Na Liu<sup>1</sup>, Chris Chun-  
8 Yiu Chan<sup>2,3</sup>, Kenn Ka-Heng Chik<sup>2,3</sup>, Zhenglong Du<sup>1</sup>, Ka-Kit Au<sup>1</sup>, Haode Huang<sup>1</sup>, Hiu-On  
9 Man<sup>1</sup>, Jianli Cao<sup>2,3</sup>, Cun Li<sup>2,3</sup>, Ziyi Wang<sup>6</sup>, Jie Zhou<sup>2,3,4</sup>, Youqiang Song<sup>9</sup>, Man-Lung  
10 Yeung<sup>2,3,4</sup>, Kelvin Kai-Wang To<sup>2,3,4</sup>, David D. Ho<sup>10</sup>, Lisa A. Chakrabarti<sup>8</sup>, Xinquan Wang<sup>6</sup>,  
11 Linqi Zhang<sup>7\*</sup>, Kwok-Yung Yuen<sup>2,3,4,5\*</sup> and Zhiwei Chen<sup>1,2,3,4,12\*</sup>

12  
13 **Affiliations:**

14 <sup>1</sup>AIDS Institute, Li Ka Shing Faculty of Medicine, the University of Hong Kong, Pokfulam,  
15 Hong Kong Special Administrative Region (SAR), China

16 <sup>2</sup>Department of Microbiology, Li Ka Shing Faculty of Medicine, The University of Hong  
17 Kong, Pokfulam, Hong Kong SAR, China

18 <sup>3</sup>State Key Laboratory of Emerging Infectious Diseases, The University of Hong Kong,  
19 Pokfulam, Hong Kong SAR, China

20 <sup>4</sup>Department of Clinical Microbiology and Infection Control, The University of Hong Kong-  
21 Shenzhen Hospital, Shenzhen, Guangdong, China

22 <sup>5</sup>Hainan-Medical University-The University of Hong Kong Joint Laboratory of Tropical  
23 Infectious Diseases, and Academician Workstation of Hainan Province, Hainan Medical  
24 University, Haikou, Hainan, China, and The University of Hong Kong, Pokfulam, Hong  
25 Kong SAR, China.

26 <sup>6</sup>The Ministry of Education Key Laboratory of Protein Science, Beijing Advanced Innovation  
27 Center for Structural Biology, Beijing Frontier Research Center for Biological Structure,  
28 Collaborative Innovation Center for Biotherapy, School of Life Sciences, Tsinghua  
29 University, Beijing 100084, China

30 <sup>7</sup>NexVac Research Center, Comprehensive AIDS Research Center, Center for Infectious  
31 Diseases, School of Medicine, Tsinghua University, Beijing 100084, China

32 <sup>8</sup> Control of Chronic Viral Infections Group, Virus & Immunity Unit, Institute Pasteur, Paris,  
33 France; CNRS UMR 3569, Paris, France

34 <sup>9</sup>School of Biomedical Sciences, The University of Hong Kong, Hong Kong SAR, China

35 <sup>10</sup>Aaron Diamond AIDS Research Center, Columbia University Vagelos College of  
36 Physicians and Surgeons, New York, NY10032, USA

37

38 <sup>11</sup>These authors made equal contributions as co-first authors.

39 \*Correspondence: [zchenai@hku.hk](mailto:zchenai@hku.hk); [zhanglinqi@mail.tsinghua.edu.cn](mailto:zhanglinqi@mail.tsinghua.edu.cn); [kyyuen@hku.hk](mailto:kyyuen@hku.hk)

40 **ABSTRACT**

41 Robust severe acute respiratory syndrome coronavirus-2 (SARS-CoV-2) infection in nasal  
42 turbinate (NT) accounts for high viral transmissibility, yet whether neutralizing IgA  
43 antibodies can control it remains unknown. Here, we evaluated receptor binding domain  
44 (RBD)-specific monomeric B8-mIgA1 and B8-mIgA2, and dimeric B8-dIgA1 and B8-dIgA2  
45 against intranasal SARS-CoV-2 challenge in Syrian hamsters. These antibodies exhibited  
46 comparably potent neutralization against authentic virus by competing with human  
47 angiotensin converting enzyme-2 (ACE2) receptor for RBD binding. While reducing viruses  
48 in lungs, pre-exposure intranasal B8-dIgA1 or B8-dIgA2 led to 81-fold more infectious  
49 viruses and severer damage in NT than placebo. Virus-bound B8-dIgA1 and B8-dIgA2 could  
50 engage CD209 as an alternative receptor for entry into ACE2-negative cells and allowed viral  
51 cell-to-cell transmission. Cryo-EM revealed B8 as a class II neutralizing antibody binding  
52 trimeric RBDs in 3-up or 2-up/1-down conformation. Therefore, RBD-specific neutralizing  
53 dIgA engages an unexpected action for enhanced SARS-CoV-2 nasal infection and injury in  
54 Syrian hamsters.

55

56 **Keywords**

57 SARS-CoV-2; COVID-19; coronavirus; neutralizing antibody; IgG; cryo-EM; mIgA; dIgA;  
58 nasal turbinate; antibody-dependent enhancement

## 59 INTRODUCTION

60 Severe acute respiratory syndrome coronavirus 2 (SARS-CoV-2), a member of the  
61 *Betacoronavirus* genus, is the causative agent of Coronavirus Disease 2019 (COVID-19) <sup>1</sup>.  
62 SARS-CoV-2 enters host cells through the binding of the receptor binding domain (RBD) of  
63 its surface trimeric spike (S) protein to the cellular angiotensin-converting enzyme-2 (ACE-  
64 2) receptor <sup>2-4</sup>. After the ACE2 binding, the S protein is cleaved into S1 and S2 subunits by  
65 host cellular proteases including the transmembrane protease serine 2 (TMPRSS2) to  
66 promote fusion of viral and cellular membranes for viral entry <sup>5-8</sup>. Apparently, these entry  
67 processes are similar to those of SARS-CoV-1 <sup>9-12</sup>, the causative agent of SARS, although  
68 these two coronaviruses share just 76% and 40% amino acid identity between their genomes  
69 and their RBD external subdomains, respectively <sup>13,14</sup>. SARS-CoV-2, however, has displayed  
70 remarkably higher transmissibility than SARS-CoV-1. By August 2021, the rapid all-year-  
71 round transmission of SARS-CoV-2 has resulted in over 200 million infections and 4 million  
72 deaths globally <sup>15</sup> since the outbreak of COVID-19 reported in December 2019. This is in  
73 marked contrast to the SARS epidemic, which caused only 8096 cases and 774 deaths, and  
74 disappeared in 2003 <sup>16</sup>. Therefore, understanding the mechanisms underlying the high  
75 transmissibility of SARS-CoV-2 is essential for pandemic control.

76

77 The high transmissibility of SARS-CoV-2 is likely associated with multiple factors. First,  
78 unlike SARS-CoV-1-infected cases characterized by high fever and prominent respiratory  
79 symptoms, afebrile individuals with SARS-CoV-2 were often found upon diagnosis, allowing  
80 person-to-person transmissions by asymptomatic carriers including international travellers <sup>17-</sup>  
81 <sup>20</sup>. Second, while both coronaviruses employ the same receptor ACE2, highly conserved  
82 RBD residues or side chain properties of SARS-CoV-2 might account for increased ACE2  
83 binding <sup>9-12</sup>. Third, the unique insertion of the PRRA sequence in SARS-CoV-2 S  
84 glycoprotein promotes higher virion infectivity and cell-cell fusion, leading to enhanced  
85 pathogenicity *in vivo* <sup>21-23</sup>. Fourth, by altering the S protein conformation, the D614G  
86 mutation increases the stability of S trimer to avoid premature S1 shedding, which results in a  
87 rapid dominance of this mutation globally <sup>24,25</sup>. The D614G mutation also induces higher  
88 infectious titres in nasal washes and the trachea of infected hamsters <sup>26</sup>. Multiple mechanisms,  
89 therefore, contribute to the high upper respiratory tract (URT) viral loads characteristic of  
90 SARS-CoV-2 infection <sup>27-29</sup>, which facilitates viral transmission in the human population. Till  
91 now, the role of nasal IgA remains understudied. In particular, whether antibody-dependent

92 enhancement (ADE) of SARS-CoV-2 infection has any place *in vivo* remains an open  
93 question<sup>30</sup>.

94

95 Since the outbreak of COVID-19, worldwide research efforts have led to the identification of  
96 many potent human neutralizing antibodies (HuNAbs) mainly in IgG form for preclinical and  
97 clinical developments<sup>31-38</sup>. Some studies also investigated IgA antibodies, which are known  
98 to play an important role in mucosal immunity, especially in their secretory form (SIgA)<sup>39,40</sup>.  
99 RBD-specific IgA antibodies were rapidly discovered in COVID-19 patients<sup>41</sup>. IgA and  
100 SIgA were even shown to dominate the early antibody response as compared to IgG and IgM  
101 in saliva and bronchoalveolar lavage fluids due to expansion of IgA plasmablasts with  
102 mucosal homing characteristics<sup>42,43</sup>. However, it was noted that COVID-19 patients with  
103 acute respiratory distress syndrome (ARDS) had higher SIgA in the airway mucosa for  
104 unknown reasons<sup>44</sup>. Moreover, a recent study reported that SARS-CoV-2 viral loads were  
105 closely associated with spike-specific IgA responses in the nasal samples of acute COVID-19  
106 patients<sup>45</sup>. Since dIgA were shown to be about 15 times more potent than mIgA *in vitro*  
107 against the same target, dIgA were suggested to be particularly valuable for therapeutic  
108 application against SARS-CoV-2<sup>46</sup>. It is essential to investigate the potential of mIgA and  
109 dIgA in preventing SARS-CoV-2 infection *in vivo*.

110

111 In this study, we used the technology of single B cell antibody gene cloning to generate a  
112 panel of SARS-CoV-2 RBD-specific monoclonal HuNAbs from the peripheral blood  
113 mononuclear cells (PBMCs) of one acute and three convalescent COVID-19 patients in Hong  
114 Kong. Since intramuscular or intranasal inoculation of several potent IgG HuNAbs cannot  
115 completely prevent SARS-CoV-2 infection in the nasal turbinate (NT) of Syrian hamsters<sup>47</sup>,  
116 we sought to improve the efficacy of HuNAb by converting IgG to IgA. To achieve this goal,  
117 we engineered the potent B8-IgG1 into monomeric IgA1 (B8-mIgA1), monomeric IgA2 (B8-  
118 mIgA2), dimeric (B8-dIgA1) and dimeric IgA2 (B8-dIgA2), and determined their efficacies  
119 in the Syrian hamster model against the live intranasal SARS-CoV-2 challenge<sup>48</sup>.

120

## 121 **RESULTS**

### 122 **Characterization of human monoclonal antibodies from COVID-19 patients**

123 To isolate human monoclonal antibodies (MAbs), we obtained peripheral blood mononuclear  
124 cells (PBMCs) from one acute (P4) and three convalescent (P1-P3) COVID-19 patients in  
125 Hong Kong at a mean 73.5 ( $\pm$ 25) days after symptoms onset (Supplementary Table 1).  
126 Enzyme-linked immunosorbent assay (ELISA) and pseudovirus neutralization assays  
127 revealed that all patient sera showed SARS-CoV-2 RBD- and spike-specific binding (Fig. 1A  
128 and 1B) and neutralizing antibody (NAb) activities (Fig. 1C). The mean NAb IC<sub>50</sub> titer was  
129 1:1753 with a range of 1:638-1:5701. Flow cytometry was then used to sort SARS-CoV-2-  
130 specific immunoglobulin positive (IgG<sup>+</sup>) memory B cells from individual PBMC samples  
131 using two fluorescent-conjugated RBD probes. The percentage of RBD-binding IgG<sup>+</sup>  
132 memory B cells ranged from 0.19% to 0.52% (Supplementary Fig. 1A and Supplementary  
133 Fig. 1B). We successfully cloned a total of 34 MAbs from these patients, including 3 from  
134 P1, 8 from P2, 17 from P3 and 6 from P4. We confirmed that 18 of these MAbs exhibited  
135 RBD-specific binding activities detected by ELISA (Supplementary Fig. 1C). No clear  
136 dominance of heavy (H) chain gene family was found among these 4 subjects by sequence  
137 analysis (Fig. 1D, left panels). VLK1, however, was the most used variable gene family for  
138 the light (L) chain (Fig. 1D, right panels). The average somatic hypermutation (SHM) rate  
139 ranged from 0% to 12.2% for the H chain and from 0.7% to 7.9% for the L chain (Fig. 1E,  
140 left). The average complementarity-determining region 3 (CDR3) lengths ranged from 12.3  
141 to 17.4 for the H chain and 8.4 to 9.4 for the L chain, respectively (Fig. 1E, right). These  
142 results suggested overall comparable degrees of affinity maturation in these RBD-specific  
143 human MAbs obtained from individual memory B cells of four Hong Kong patients.

144

#### 145 **Specificity and potency of SARS-CoV-2-specific human neutralizing antibodies**

146 To determine the antiviral activities of these 18 RBD-specific human MAbs, we performed  
147 binding and neutralization assays. Five of them, namely A6-IgG1, B4-IgG1, B7-IgG1, B8-  
148 IgG1 and C5-IgG1 displayed RBD- and spike- specific binding by ELISA (Fig. 1F) and  
149 neutralizing activities against both pseudotyped and authentic viruses (Fig. 1G and  
150 Supplementary Fig. 1D). Interestingly, the four most potent HuNAbs, B4-IgG1, B7-IgG1,  
151 B8-IgG1 and C5-IgG1, all came from patient P3 (Supplementary Fig. 1D). Sequence  
152 analysis revealed strong similarities between B7-, B8-, and C5-IgG1, which all contained an  
153 IGHV1-69 heavy chain gene and an IGKV3 kappa light chain gene. B4-IgG1 contained  
154 distinct IGHV3-66 and IGKV1-33 genes with CDR3 lengths of 12 amino acids (aa) and 9 aa,  
155 and somatic hypermutation (SHM) rate of 3.8% and 4.6%, respectively (Supplementary

156 Table 2). B7 and B8 were the most similar, as both contained IGHV1-69 and IGKV3-11  
157 though B8 had a shorter CDR3 (14 aa vs 18 aa) and higher SHM (4.8% vs 0.0%) than those  
158 of B7 in the heavy chain. In the L chain, B7 and B8 shared a 9 aa CDR3, but B8 had a higher  
159 SHM rate than that of B7 (1.7% vs 0.7%) C5-IgG1 had a similar IGHV1-69 light chain gene  
160 with a 16 aa CDR3 and 2.4% SHM, but a different IGKV3-20 with a 9 aa CDR3 and 2.8%  
161 SHM. By ELISA, these four P3-derived HuNAbs bound to the SARS-CoV-2 RBD with  
162 half-maximal effective concentration ( $EC_{50}$ ) values ranging from 0.02 to 0.06  $\mu\text{g/ml}$ ,  
163 indicating stronger binding than that of the P4-derived A6-IgG1 (0.3  $\mu\text{g/ml}$ ) (Fig. 1F, left and  
164 Supplementary Table 3). P3-derived MAbs also exhibited stronger binding activities to the  
165 spike, with the  $EC_{50}$  values ranging from 0.018 to 0.06  $\mu\text{g/ml}$ , compared to A6-IgG1 (17.94  
166  $\mu\text{g/ml}$ ) (Fig. 1F, right and Supplementary Table 3). Neutralizing assays using pseudoviruses  
167 revealed that these four potent HuNAbs had  $IC_{50}$  values ranging from 0.0095 to 0.038  $\mu\text{g/ml}$ ,  
168 and  $IC_{90}$  values ranging from 0.046 to 0.136  $\mu\text{g/ml}$ , respectively (Fig. 1G, left and  
169 Supplementary Table 4). Moreover, B8 proved to be the most potent HuNAb, capable of  
170 inhibiting authentic SARS-CoV-2 with an  $IC_{50}$  value of 0.013  $\mu\text{g/ml}$  and an  $IC_{90}$  value of  
171 0.032  $\mu\text{g/ml}$ , respectively (Fig. 1G, right and Supplementary Table 4). We then determined if  
172 these HuNAbs could compete with ACE2 for RBD binding by surface plasmon resonance  
173 (SPR). We found that all of them strongly competed with ACE2 (Fig. 1H). In line with the  
174 ELISA results, B8-IgG1 displayed the best  $KD$  value for RBD binding (169 pM)  
175 (Supplementary Fig. 2A, Supplementary Table 5) and the strongest competition with ACE2  
176 (Fig. 1H), which explained its potent neutralizing activity. As B4-IgG1 displayed only partial  
177 competition for RBD binding with the other antibodies (Supplementary Fig. 2B), we further  
178 performed antibody synergy experiments using the pseudotype neutralization assay. No  
179 significant synergistic effects were found between any pairs of these four HuNAbs  
180 (Supplementary Fig. 2C). These results demonstrated that B4-, B7-, B8- and C5-IgG1 were  
181 all RBD-specific and competed with ACE2 for similar sites on the RBD.

182

### 183 **B8-IgG1 pre-exposure prophylaxis and post-exposure treatment in the golden Syrian** 184 **hamster model**

185 To determine the efficiency of B8-IgG1 in pre-exposure prophylaxis and post-exposure  
186 treatment against live intranasal SARS-CoV-2 infection, we administered B8-IgG1  
187 intraperitoneally in golden Syrian hamsters, before or after viral challenge in our Biosafety  
188 Level-3 (BSL-3) animal laboratory (Fig. 2A). In the pre-exposure prophylaxis group (G1, n



189 = 4), each hamster received a single intraperitoneal injection of 1.5 mg/kg B8-IgG1. In the  
190 post-exposure treatment groups, each hamster received a single intraperitoneal injection of  
191 1.5 mg/kg B8-IgG1 at day 1 (G2, n = 4), day 2 (G3, n = 4) or day 3 (G4, n = 4) postinfection  
192 (dpi), respectively (Fig. 2A). The challenge dose was  $10^5$  plaque-forming units (PFU) of live  
193 SARS-CoV-2 (HKU-001a strain)<sup>47,48</sup>. Another group of hamsters (G0, n = 4) received PBS  
194 injection as a no-treatment control. One G4 animal died accidentally during the procedure.  
195 Since Syrian hamsters recover quickly from SARS-CoV-2 infection, with resolution of  
196 clinical signs and clearance of virus shedding within one week after infection<sup>26,48</sup>, we chose  
197 to sacrifice the animals at 4 dpi for HuNAb efficacy analysis, at a time when high viral loads  
198 and acute lung injury were consistently observed. At 4 dpi, NT and lung tissues were  
199 harvested to quantify infectious viruses by measuring PFUs, viral RNA loads by real-time  
200 reverse-transcription polymerase chain reaction (RT-PCR) and infected cells by  
201 immunofluorescence (IF) staining of viral nucleocapsid protein (NP)-positive cells as we  
202 described previously<sup>47,48</sup>.

203

204 We found that infectious virus, measured by PFU, was readily detected in all tissue  
205 compartments of G0 hamsters but not in the lungs of 75% G1, 100% G2, 75% G3 and 0% G4  
206 animals, nor in the NT of 50% G1, 75% G2, 50% G3 and 25% G4 animals (Fig. 2B and 2E).  
207 The decrease in PFU was of 2-3 orders of magnitude, suggesting efficient viral suppression in  
208 the lungs for the G1, G2, and G3 groups. A sensitive RT-PCR assay further demonstrated that  
209 viral RNA copy numbers were decreased in the lungs by 3 orders of magnitude in 50% of G1  
210 hamsters (Fig. 2C). In contrast, there was no significant viral RNA reduction in the NT of G1  
211 animals (Fig. 2F), suggesting lower efficacy of B8-IgG1 to prevent viral entry in the URT  
212 than in the lungs. There were slight but not significant viral RNA load decreases in both  
213 lungs and NT of G2 and some G3 animals. We then evaluated the number of infected cells or  
214 foci in these two tissue compartments by anti-NP antibody staining. A clear decrease of NP-  
215 positive cells or foci was observed in the lungs of G1 and G2 hamsters (Fig. 2D). Abundant  
216 NP-positive cells with a diffuse distribution, however, were readily detected in the NT of all  
217 the challenged hamsters (Fig. 2G). These results demonstrated that systemic B8-IgG1  
218 injection was effective at reducing productive SARS-CoV-2 infection in the lungs when used  
219 for pre-exposure prophylaxis and early treatment especially within 48 hours post infection,  
220 but was insufficient to prevent viral infection in the NT.

221



222 To determine the correlates of B8-IgG1-mediated protection, we also measured the antibody  
223 concentration in serum, lung homogenate and NT homogenates at 0 and 4 dpi for all  
224 experimental animals. On average, 4,257 ng/ml and 2,101 ng/ml B8-IgG1 were found in  
225 animal sera at 0 and 4 dpi (Supplementary Table 6). On 4 dpi, lung and NT homogenates  
226 contained 128 ng/ml and 20 ng/ml in G1, 238 ng/ml and 86 ng/ml in G2, 229 ng/ml and 93  
227 ng/ml in G3, and 192 ng/ml and 46 ng/ml in G4 animals, respectively. These results  
228 demonstrated that most animals maintained higher peripheral B8-IgG1 antibody  
229 concentration, while a decreasing concentration gradient was observed in the lungs and NT  
230 during infection. The concentrations of B8-IgG1 measured in NT homogenates were close to  
231 the neutralization IC<sub>90</sub> measured *in vitro* (32 ng/ml), explaining why infectious virus was  
232 undetectable in the PFU assay. These findings are in line with results obtained for other  
233 potent IgG HuNAbs administered systemically, as reported in our previous study<sup>47</sup>. The B8-  
234 IgG1 concentrations measured in the NT appeared insufficient to completely block infection  
235 *in vivo*, as indicated by the presence of NP-positive cells scattered throughout the NT.

236

### 237 **Pre-exposure prophylaxis by monomeric B8-mIgA1 and B8-mIgA2 in Syrian hamsters**

238 Since systemic administration of the RBD-specific neutralizing B8-IgG1 did not suppress  
239 SARS-CoV-2 nasal infection effectively, we sought to construct various types of IgA for  
240 mucosal intervention. For this purpose, we engineered B8-IgG1 into monomeric B8-mIgA1  
241 and B8-mIgA2, and then into dimeric B8-dIgA1 and B8-dIgA2 by introducing the J chain.  
242 By *in vitro* characterization, purified B8-mIgA1, B8-mIgA2, B8-dIgA1 and B8-dIgA2  
243 retained similar binding to RBD and spike by ELISA as compared to B8-IgG1  
244 (Supplementary Fig. 3A-B, Supplementary Table 7), and comparable antiviral activities  
245 based on neutralization IC<sub>50</sub> and IC<sub>90</sub> values ((Supplementary Fig. 3C-D and Supplementary  
246 Table 8). That said, B8-mIgA2 and B8-dIgA2 showed slightly more potent IC<sub>90</sub> activities  
247 than B8-IgG1 in the pseudovirus neutralization assay using 293T-ACE2 cells as targets  
248 (Supplementary Table 8). After introducing J chain, the proper dimer formation of B8-dIgA1  
249 and B8-dIgA2 was confirmed by size exclusion chromatography analysis (Supplementary Fig.  
250 3E-F). Furthermore, B8-mIgA1, B8-mIgA2, B8-dIgA1 and B8-dIgA2 also retained  
251 comparable competition with ACE2 for binding to spike by SPR analysis (Supplementary Fig.  
252 3G-J). Therefore, the engineered IgA had the expected structural properties, and showed  
253 antiviral activities as potent as those of B8-IgG1 *in vitro*.

254 We then evaluated the monomeric B8-mIgA1 and B8-mIgA2 in the hamster model, using a  
255 higher 4.5 mg/kg dose via either intranasal or intraperitoneal injection, and used the same  
256 amount of intranasal B8-IgG1 inoculation as a control (Fig. 3A to 3I). Interestingly, while  
257 changes in total RdRp and subgenomic sgNP viral RNA loads were not obvious (Fig. 3D to  
258 3E), B8-IgG1 and B8-mIgA1 (both *i.n.* and *i.p.*), but not B8-mIgA2, were able to  
259 significantly suppress infectious virus production (PFU) in the lungs of 75% infected  
260 hamsters by 2 orders of magnitude (Fig. 3D). Sporadic infected cell foci were still detected in  
261 the lung sections by anti-NP staining (Fig. 4E and Supplementary Fig. 4A), suggesting that  
262 protection conferred by B8-IgG1 and B8-mIgA1 was not complete. B8-mIgA2 was not able  
263 to suppress viral RNA load nor PFU in the challenged hamsters, regardless of the route of  
264 antibody injection. On the other hand, like B8-IgG1, both B8-mIgA1 and B8-mIgA2 did not  
265 achieve significant viral suppression in the NT. After intranasal administration of either B8-  
266 mIgA1 or B8-mIgA2, some hamsters even showed a trend of slightly increased infectious  
267 virus production in NT, though this did not reach statistical significance (Fig. 3F-3H). Among  
268 these animals, the NP-positive cells were detected readily in the NT, as demonstrated by the  
269 whole section scanning, indicating the comparable distribution compared with the B8-IgG1  
270 and no-treatment groups (Fig. 3I). These results were consistent with many NP-positive cells  
271 observed in diffusely infected areas of NT by classic IF (Supplementary Fig. 4B). These  
272 results demonstrated that B8-mIgA1 was more potent than B8-mIgA2 at limiting SARS-  
273 CoV-2 infection in the lungs, but that both mIgA did not prevent nor significantly limit  
274 SARS-CoV-2 nasal infection.

275

### 276 **B8-dIgA1 and B8-dIgA2 mediate enhancement of SARS-CoV-2 nasal infection and** 277 **injury in Syrian hamsters**

278 Next, we tested the effects of dimeric B8-dIgA1 and B8-dIgA2 in Syrian hamsters. To  
279 improve protective efficacy of intranasal dIgA treatment, we included a 3-fold higher dosage  
280 group of 13.5 mg/kg besides the 4.5 mg/kg group (Fig. 4A to 4I), and we shortened the  
281 interval between dIgA and virus inoculation to 12 hours (Fig. 4A). Both RdRp and sgNP viral  
282 RNA loads dropped significantly in the lungs of hamsters that received the high dose of B8-  
283 dIgA2 compared to the no-treatment group (Fig. 4B and 4C). Both B8-dIgA1 and B8-dIgA2  
284 at the high dose also suppressed infectious viruses (PFU) in the lungs of 75% and 100%  
285 treated hamsters, respectively (Fig. 4D). High dose B8-dIgA1 and B8-dIgA2 also decreased  
286 the number of NP-positive cells or foci in the lungs, with a more marked change for B8-

287 dIgA2 (Fig. 4E and Supplementary Fig. 5A). Unexpectedly, however, we observed  
288 significantly enhanced SARS-CoV-2 nasal infection and tissue damage in most infected  
289 hamsters included the low and high dose groups of both B8-dIgA1 and B8-dIgA2, in all the  
290 four assays used (Fig. 4F to 4I). High dose administration of B8-dIgA1 or B8-dIgA2 resulted  
291 in increased PFU production in the NT by 37-fold and 81-fold, respectively, compared to the  
292 no-treatment group (Fig. 4H). Since our model showed comparable NT PFU on day 2 and  
293 day 4 as described previously<sup>48</sup>, this level of enhanced infection was unusual. It was also not  
294 observed with B8-IgG1 or monomeric B8-mIgA1 and B8-mIgA2 treatment, as described  
295 above. Moreover, the distribution of NP-positive cells in hamsters treated with dimeric B8-  
296 IgA was broader and reached deeper into NT tissue compared to the no-treatment group, as  
297 shown by whole section scanning (Fig. 4I and Supplementary Fig. 5B), which was associated  
298 with more severe and extensive epithelium desquamation and luminal cell debris  
299 (Supplementary Fig. 5C). The density of nasal NP<sup>+</sup> cells was also significantly higher in B8-  
300 dIgA2-treated hamsters than in PBS-treated animals (Supplementary Fig. 5D-E). It is  
301 therefore conceivable that treatment with dimeric B8-IgA expanded the type and distribution  
302 of target cells in the nasal epithelium. Critically, we confirmed that control dimeric dIgA1  
303 and dIgA2 did not enhance SARS-CoV-2 infection under the same experimental conditions  
304 (Supplementary Fig. 6). These results demonstrated that, instead of inducing viral  
305 suppression, pre-exposure dimeric B8-dIgA1 and B8-dIgA2 enhanced SARS-CoV-2 nasal  
306 infection and injury significantly in Syrian hamsters, which was consistently found in three  
307 independent experiments.

308 To validate the role of B8-dIgA1 and B8-dIgA2, we then measured B8-IgA concentrations in  
309 the serum at day 0 and 4 dpi, and in the lung and NT homogenates at 4 dpi. B8-dIgA1 and  
310 B8-dIgA2 were primarily detected in lung homogenates at 4 dpi and were apparently  
311 undetectable in the serum and NT homogenates (Supplementary Table 9). The enhanced  
312 viral replication in NT probably exhausted B8-dIgA1 and B8-dIgA2 locally, through  
313 antibody-virus complex formation and clearance<sup>30</sup>. To address this possibility, we treated  
314 separately five groups of naïve Syrian hamsters (n=4 per group) with each antibody at the 4.5  
315 mg/kg dose. Twelve hours after the inoculation, antibody concentrations were readily  
316 detected in each tissues compartment (Supplementary Table 10). The highest concentrations  
317 of dIgA antibodies were found in lung homogenates, followed by nasal washes, NT  
318 homogenates, and serum. These results suggest that B8-dIgA1 and B8-dIgA2 concentrations  
319 in the NT and lungs were still above their neutralization IC<sub>90</sub> values at the time of viral

320 challenge, indicating that the results obtained in our experiments could not be explained by  
321 the insufficient amounts of antibodies.

322

### 323 **B8-dIgA1- and B8-dIgA2-mediated enhancement of SARS-CoV-2 infection via CD209**

324 Since B8 antibodies share the same binding site to the RBD domain, we sought to investigate  
325 possible mechanisms of B8-dIgA1- and B8-dIgA2-enhanced infection. First, we consistently  
326 found that 10 ng/ml B8-dIgA1 or B8-dIgA2 completely neutralized SARS-CoV-2 infection  
327 in human renal proximal tubule cells (HK-2), as measured in our previously reported  
328 immunofluorescence assay (Supplementary Fig. 7)<sup>49</sup>. We also tested B8-mIgA2 and B8-  
329 dIgA2 neutralizing capacity in the MucilAir<sup>TM</sup> model, consisting of a reconstructed human  
330 nasal epithelium, which contained goblet, ciliated, and basal cells (Fig. 5A)<sup>50</sup>. Both B8-  
331 mIgA2 and B8-dIgA2 neutralized SARS-CoV-2 in a dose-dependent fashion, when  
332 compared to a dIgA2 control antibody. Similar experiments were carried out in the presence  
333 of the mucus naturally secreted by goblet cells, to determine whether dIgA interaction with  
334 the mucus may alter their neutralization capacity. However, B8-dIgA2 showed the same  
335 neutralization capacity in the presence and absence of mucus. These results demonstrated that  
336 B8-dIgA1 and B8-dIgA2 did not enhance SARS-CoV-2 infection in either human HK-2 or  
337 primary airway epithelial cells, which primarily expressed human ACE2 as a viral receptor.  
338 We then turned our attention to ACE2-independent mechanisms that might be associated with  
339 dimeric IgA-mediated enhancement of SARS-CoV-2 infection. Considering that mucosal  
340 monocyte-derived dendritic cells (DC) could mediate SARS-CoV-1 infection and  
341 dissemination in rhesus monkeys as early as 2 dpi, as we previously reported<sup>51</sup>, we sought to  
342 investigate the role of DC-expressed surface receptors. We focused on CD209 (DC-SIGN),  
343 because this lectin was previously shown to act as a cellular receptor for secretory IgA<sup>52</sup>. By  
344 IF staining, intranasal administration of B8-dIgA2 alone did not increase CD209 expression  
345 in the NT of treated hamsters (Fig. 5B, left). Upon SARS-CoV-2 infection, however, we  
346 noted an increase in CD209-positive cells in olfactory epithelium devoid of ACE2 expression  
347 (Fig. 5B, middle). Importantly, most CD209<sup>+</sup> cells were positive for NP (Fig. 5B, right),  
348 indicating that these CD209<sup>+</sup> cells were likely permissive to SARS-CoV-2 infection. We then  
349 determined whether B8-dIgA1 and B8-dIgA2 could enhance SARS-CoV-2 infection in 293T  
350 cells expressing human CD209 or CD299 but not ACE2. Using a low MOI of 0.05, we found  
351 that pre-incubation of B8-dIgA1 and B8-dIgA2 enhanced live SARS-CoV-2 infection  
352 significantly in 293T cells expressing human CD209, as determined by increased viral NP

353 production (Fig. 5C). Interestingly, human CD299, a type II integral membrane protein that  
354 is 77% identical to CD209, did not show similar activities in the same experiment (Fig. 5C).  
355 Control dIgA1 and dIgA2 did not show any enhancement in NP<sup>+</sup> cell detection compared  
356 with virus only. Considering that CD209<sup>+</sup> DCs promote HIV-1 transmission to CD4<sup>+</sup> T cells  
357 via cell-cell contacts, we speculated that B8-dIgA1 and B8-dIgA2 might not be able to block  
358 the similar process for SARS-CoV-2. Indeed, by testing the B8 antibodies at concentrations  
359 100-times higher than IC<sub>90</sub> neutralization values (around 3000 ng/ml), none of B8-IgG1, B8-  
360 mIgA1, B8-mIgA2, B8-dIgA1 and B8-dIgA2 could block cell-cell fusion (Fig. 5D). Taken  
361 together, our results demonstrated that B8-dIgA1- and B8-dIgA2-enhanced SARS-CoV-2  
362 nasal infection likely involved viral capture and infection of mucosal CD209<sup>+</sup> cells, followed  
363 by more robust infection of ACE2<sup>+</sup> epithelial cells through trans-infection via cell-cell spread  
364 in NT.

365

### 366 **Cryo-EM analysis of the spike-B8 complex**

367 To understand the potential mechanism of action of B8 HuNAb, we performed a cryo-EM  
368 single-particle analysis of B8 Fab bound to the SARS-CoV-2 spike ectodomain trimer  
369 (Supplementary Fig. 8). Two B8-spike complex structures were determined based on 351,095  
370 and 616,799 particles collected, respectively (Supplementary Table 11). One structure at 2.67  
371 Å resolution contained the spike with all three RBDs adopting the “up” conformation (3u),  
372 where each “up” RBD was bound by one B8 Fab (Fig. 6A-B). The other structure at 2.65 Å  
373 resolution contained one spike trimer with 2 RBDs in the “up” conformation and 1 RBD in  
374 the “down” conformation (2u1d), where each RBD was also bound by one B8 Fab despite the  
375 presence of two distinct RBD conformations (Fig. 6C-D). After superimposing the “3u” and  
376 “2u1d” spikes, a ~53-degree rotation was observed between the “up” RBD (red color) in the  
377 3u spike trimer and the “down” RBD (gray) in the 2u1d spike trimer (Fig. 6E). The B8 Fab  
378 appeared to bind to the receptor-binding motif (RBM) of the RBD through its heavy chain for  
379 most of the interactions (Fig. 6F-G). Therefore, the cellular receptor ACE2 would clash with  
380 the B8 Fab due to the overlap of their respective epitopes on the RBM (Fig. 6F-H and  
381 Supplementary Table 12). The elucidation of the epitope revealed that B8 could be grouped  
382 into the SARS-CoV-2 neutralizing antibody class II<sup>53</sup>. These structural findings were further  
383 supported by neutralization assays using a panel of pseudoviruses containing naturally  
384 occurring mutations. Indeed, the E484K mutation from the South African SA-9 strain,  
385 which is located within the B8-binding interface, caused a major loss of neutralizing potency

386 for all the B8 isotypes tested: IgG1, mIgA1, mIgA2, dIgA1 and dIgA2 (Supplementary Table  
387 13). The comparable neutralization profiles of these NABs against the full panel of viral  
388 variants also indicated that the conformation of key RBD-binding residues remained  
389 unchanged after engineering of the constant regions of these B8 isotypes.

390

## 391 **DISCUSSION**

392 In this study, we investigated the preventive potential of a potent RBD-specific NAb B8  
393 primarily in the forms of monomeric and dimeric IgA against live intranasal SARS-CoV-2  
394 infection in the golden Syrian hamster model as compared with B8-IgG1<sup>47,48</sup>. While these  
395 B8-IgA antibodies maintained neutralizing activities against SARS-CoV-2 *in vitro* similar to  
396 those of B8-IgG1, they displayed distinct *in vivo* effects, with clear differences in their  
397 capacity to modulate viral infection in the NT. Pretreatment by intranasal administration of  
398 4.5 mg/kg of monomeric B8-mIgA1 or B8-mIgA2 did not significantly reduce infectious  
399 virus production in the NT homogenates. On the contrary, the antibody isotype had a marked  
400 effect, as intranasal administration of 4.5 mg/kg and 13.5 mg/kg dimeric B8-dIgA1 or B8-  
401 dIgA2 paradoxically increased the amount of infectious virus (PFU) in NT homogenates.  
402 This enhancing effect was not observed with several intranasal IgG HuNABs previously  
403 tested by other groups or our team<sup>47,54</sup>. Mechanistically, instead of neutralization, virus-  
404 bound B8-dIgA1 and B8-dIgA2 used CD209 as an alternative receptor to infect non-ACE2  
405 cells. CD209<sup>+</sup> cells were increased and permissive to viral infection in the olfactory  
406 epithelium of Syrian hamsters upon SARS-CoV-2 infection, suggesting that this cell  
407 population could contribute to viral mucosal seeding. Indeed, we found that CD209  
408 expressing cells could be infected *in vitro* by live SARS-CoV-2 at 0.05 MOI in the presence  
409 of B8-dIgA1 and B8-dIgA2. Since none of the B8-based MABs could prevent SARS-CoV-2  
410 cell-to-cell transmission, even at high concentration *in vitro*, virus-laden mucosal CD209<sup>+</sup>  
411 cells might trans-infect ACE2<sup>+</sup> cells through cell-to-cell contacts in NT, resulting in enhanced  
412 infection and injury. Cryo-EM analysis further indicated that B8 is a typical class II HuNAB  
413 that binds to the SRAS-CoV-2 spike RBD in either a 3u or a 2u1d mode. Our findings,  
414 therefore, reveal a previously unrecognized pathway for RBD-specific dimeric IgA-mediated  
415 enhancement of SARS-CoV-2 nasal infection and injury in Syrian hamsters.

416

417 The role of dimeric IgA has been explored primarily for mucosal transmitted viruses. At the  
418 mucosal surface, the major IgA type is the secretory form, which is generated from dIgA by



419 the acquisition of a secretory component upon endocytosis and secretion by epithelial cells.  
420 In the simian AIDS macaque model, neutralizing dIgA given directly into the rectal lumen  
421 can prevent viral acquisition in rhesus monkeys challenged via the mucosal route <sup>55</sup>.  
422 Although the administered dIgA did not contain the secretory component (SC), they might  
423 have associated with free SC, which is present in mucosal secretions such as human lung  
424 lavages <sup>56</sup>. Neutralizing dIgA1 and dIgA2 could be protective through several mechanisms,  
425 including direct virus neutralization, virion capture, or the inhibition of virion transcytosis  
426 across the epithelium <sup>40</sup>. In this macaque study, however, Watkins et al. demonstrated that the  
427 dimeric HGN194 dIgA2 protected only 1/6 animals in a rectal challenge model <sup>55</sup>. Recently,  
428 Taylor et al. found an increase in virion number and penetration depth in the transverse colon  
429 and mesenteric lymph nodes, after mucosal treatment with the HGN194 dIgA2 compared to  
430 a PBS control <sup>57</sup>. The authors suggested that virus-specific dIgA somehow mediated the  
431 delivery of virus immune complexes to the mesenteric lymph nodes for systemic infection.  
432 Here, we report that SARS-CoV-2 may subvert the action of potent neutralizing antibodies,  
433 as pretreatment with neutralizing B8-dIgA1 and B8-dIgA2 induced a more robust nasal  
434 infection via a previously unrecognized mode of viral enhancement.

435

436 SARS-CoV-2 engages CD209<sup>+</sup> cells to evade ACE2-dependent neutralizing B8-dIgA1 and  
437 B8-dIgA2 for enhanced NT infection and injury. Previous studies have indicated various  
438 scenarios for ADE occurrence in viral infections. The well-known dengue ADE has been  
439 associated with poorly neutralizing cross-reactive antibodies against a heterologous viral  
440 serotype, leading to increased infection of FcγR-expressing cells <sup>58</sup>. Recent findings  
441 suggested that an increase in afucosylated antibodies contribute to dengue ADE <sup>59</sup>. In  
442 contrast, vaccine-associated enhanced respiratory disease induced by respiratory syncytial  
443 virus has not been found to be antibody-dependent <sup>60</sup>. For SARS and MERS, ADE observed  
444 *in vitro* depended on binding of the antibody Fab to the virus and the binding of the Fc  
445 component to FcγR on target cells <sup>61</sup>. One study found that spike IgG antibody abrogated  
446 wound-healing responses in SARS-CoV-1-infected Chinese macaques <sup>62</sup>. In the case of  
447 COVID-19, vaccination and passive immunization studies have not revealed ADE of disease  
448 severity <sup>63</sup>. Comprehensive studies, however, are necessary to define the clinical correlates of  
449 protective immunity against SARS-CoV-2, especially in the context of vaccine breakthrough  
450 infections. During natural infection, one study indicated that the increase in afucosylated  
451 antibodies might contribute to COVID-19 severity <sup>64</sup>. To date, four classes of potent HuNAbs  
452 have been isolated from convalescent COVID-19 patients <sup>34,53</sup>. The molecular mechanism of



453 neutralization for most potent HuNABs was primarily through blocking the interaction  
454 between ACE2 and the spike RBD. Currently, systemic RBD-specific HuNAB treatment  
455 remains to be improved for therapeutic suppression of SARS-CoV-2 replication in the NT or  
456 URT, both in animal models and human trials <sup>47,48,65</sup>. One limitation is the insufficient  
457 amounts of HuNABs distributed on the nasal mucosal surface for protection <sup>47</sup>. Other reasons  
458 might include alternative entry pathways engaged by SARS-CoV-2 to evade HuNABs. To  
459 this end, Liu et al. reported recently that antibodies against the spike N-terminal domain  
460 (NTD) induced an open conformation of the RBD and thus enhanced the binding capacity of  
461 the spike to the ACE2 receptor, leading to increased viral infectivity <sup>66</sup>. Yeung et al.  
462 demonstrated nicely that SARS-CoV-2 could engage soluble ACE2 (sACE2) and then bind  
463 alternate receptors for viral entry, through interaction between a spike/sACE2 complex with  
464 the angiotensin II AT1 receptor, or interaction between a spike/sACE2/vasopressin complex  
465 with the AVPR1B vasopressin receptor, respectively <sup>49</sup>. In this study, we found that, in the  
466 presence of potent neutralizing B8-dIgA1 or B8-dIgA2 antibodies, SARS-CoV-2 used the  
467 cellular receptor CD209 for capture or infection, which likely expanded the use of CD209<sup>+</sup>  
468 cells as target cells, leading to enhanced NT infection and trans-infection. Interestingly, a  
469 preprint report suggests that cells expressing CD209 can be infected directly by SARS-CoV-2  
470 through an interaction of the spike with the NTD instead of the RBD <sup>67</sup>. This mode of action,  
471 however, was unlikely to explain our findings, because no enhancement of SARS-CoV-2  
472 nasal infection was found in presence of control dIgA1 and dIgA2. Our results rather suggest  
473 that the direct binding of virus-bound B8-dIgA1 or virus-bound B8-dIgA2 to CD209 is a  
474 likely pathway, resulting in the more severe SARS-CoV-2 nasal infection and damage. In  
475 line with our results, a previous study demonstrated that dIgA itself can use CD209 as a  
476 cellular receptor <sup>52</sup>. During the entry process, since neither B8-dIgA1 nor B8-dIgA2 could  
477 prevent virus cell-to-cell transmission, infected mucosal CD209<sup>+</sup> cells might enable a more  
478 robust viral transmission to ciliated nasal epithelial cells in NT, which show the highest  
479 expression of ACE2 and TMPRSS2 receptors <sup>65</sup>. In support of this notion, previous studies  
480 indicated that mucosal DCs can capture HIV-1 through binding of its envelope glycoproteins  
481 to CD209 and efficiently transfer the bound virions to CD4<sup>+</sup> T cells, in a process called trans-  
482 enhancement or trans-infection <sup>68</sup>. The trans-infection markedly decreased the neutralization  
483 efficiency of potent NABs directed at HIV <sup>69</sup>. Moreover, although monocyte-derived DCs  
484 (MDDCs) cannot support productive SARS-CoV-2 replication <sup>70</sup>, a recent study  
485 demonstrated that MDDCs could mediate efficient viral trans-infection of the Calu-3 human  
486 respiratory cell line <sup>71</sup>. Our findings of increased number of infectious viruses in NT,

487 therefore, have significant implications for SARS-CoV-2 transmission, COVID-19  
488 pathogenesis, and immune interventions.

489

#### 490 **Limitations of the study**

491 As our *in vivo* findings were obtained in Syrian hamsters, it remains to be determined  
492 whether CD209<sup>+</sup> DCs are abundantly recruited to the nasal mucosa in SARS-CoV-2-infected  
493 humans. It is, however, known that myeloid DCs are increased in the nasal epithelium upon  
494 infection<sup>51,72</sup>. Our preliminary analysis of the human nasal cytology data (under accession  
495 code EGAS00001004082) revealed the presence of increased CD209<sup>+</sup> DCs in addition to  
496 abundant ACE2, TMPRSS2, and furin expression in the apical side of multiciliated cells of  
497 SARS-CoV-2-infected human subjects (Supplementary Fig. 9)<sup>73</sup>. Another limitation is that  
498 we did not have an NTD-specific neutralizing dIgA for comparison. Besides the class II  
499 neutralizing dIgA such as B8-mIgA2 and B8-dIgA2 used in this study, neutralizing dIgA  
500 belonging to other classes should also be investigated in future. We also do not know whether  
501 other cellular receptor such as the polymeric immunoglobulin receptor (pIgR) plays a role in  
502 B8-dIgA-enhanced SARS-CoV-2 nasal infection. The pIgR is responsible for transcytosis of  
503 soluble dIgAs and immune complexes from the basolateral to the apical epithelial surface. It  
504 remains uncertain whether B8-dIgA-enhanced NT infection would lead to worse neuro-  
505 COVID-19. Because current intramuscular vaccinations might not induce secretory dIgA at  
506 the nasal mucosal sites<sup>74</sup>, it remains unknown whether the dIgA-mediated ADE would  
507 happen in people who received the COVID-19 vaccines or dIgA treatment. Future studies are  
508 needed to address these limitations.

509

#### 510 **METHODS**

##### 511 **Human subjects**

512 A total of 4 patients with COVID-19 including 3 convalescent cases and one acute case were  
513 recruited between February and May 2020. All patients were confirmed by reverse-  
514 transcription polymerase chain reaction (RT-PCR) as described previously<sup>28</sup>. Clinical and  
515 laboratory findings were entered into a predesigned database. Written informed consent was  
516 obtained from all patients. This study was approved by the Institutional Review Board of The  
517 University of Hong Kong/Hospital Authority Hong Kong West Cluster, the Hong Kong East  
518 Cluster Research Ethics Committee, and the Kowloon West Cluster Research Ethics  
519 Committee (UW 13-265, HKECREC-2018-068, KW/EX-20-038[144-26]).

520

521 **Syrian hamsters**

522 The animal experimental plan was approved by the Committee on the Use of Live Animals in  
523 Teaching and Research (CULATR 5359-20) of the University of Hong Kong (HKU). Male  
524 and female golden Syrian hamsters (*Mesocricetus auratus*) (aged 6–10 weeks) were  
525 purchased from the Chinese University of Hong Kong Laboratory Animal Service Centre  
526 through the HKU Laboratory Animal Unit (LAU). The animals were kept in Biosafety Level-  
527 2 housing and given access to standard pellet feed and water ad libitum following LAU's  
528 standard operational procedures (SOPs). The viral challenge experiments were then  
529 conducted in our Biosafety Level-3 animal facility following SOPs strictly, with strict  
530 adherence to SOPs

531

532 **Cell lines**

533 HEK293T cells, HEK293T-hACE2 cells Vero-E6 cells, HK2 cells and Vero-E6-TMPRSS2  
534 cells were maintained in DMEM containing 10% FBS, 2 mM L-glutamine, 100 U/mL/mL  
535 penicillin and incubated at 37 °C in a 5% CO<sub>2</sub> setting<sup>62</sup>. Expi293F<sup>TM</sup> cells were cultured in  
536 Expi293<sup>TM</sup> Expression Medium (Thermo Fisher Scientific) at 37 °C in an incubator with 80%  
537 relative humidity and a 5% CO<sub>2</sub> setting on an orbital shaker platform at 125 ±5 rpm/min  
538 (New Brunswick innova<sup>TM</sup> 2100) according to the manufacturer's instructions.

539

540 **ELISA analysis of plasma and antibody binding to RBD and trimeric spike**

541 The recombinant RBD and trimeric spike proteins derived from SARS-CoV-2 (Sino  
542 Biological) were diluted to final concentrations of 1 µg/mL/mL, then coated onto 96-well  
543 plates (Corning 3690) and incubated at 4 °C overnight. Plates were washed with PBS-T (PBS  
544 containing 0.05% Tween-20) and blocked with blocking buffer (PBS containing 5% skim  
545 milk or 1% BSA) at 37 °C for 1 h. Serially diluted plasma samples or isolated monoclonal  
546 antibodies were added to the plates and incubated at 37 °C for 1 h. Wells were then incubated  
547 with a secondary goat anti-human IgG labelled with horseradish peroxidase (HRP)  
548 (Invitrogen) or with a rabbit polyclonal anti-human IgA alpha-chain labelled with HRP  
549 (Abcam) and TMB substrate (SIGMA). Optical density (OD) at 450 nm was measured by a  
550 spectrophotometer. Serially diluted plasma from healthy individuals or previously published  
551 monoclonal antibodies against HIV-1 (VRC01) were used as negative controls.

552

553 **Isolation of RBD-specific IgG+ single memory B cells by FACS**

554 RBD-specific single B cells were sorted as previously described<sup>75</sup>. In brief, PBMCs from  
555 infected individuals were collected and incubated with an antibody cocktail and a His-tagged  
556 RBD protein for identification of RBD-specific B cells. The cocktail consisted of the Zombie  
557 viability dye (Biolegend), CD19-Percp-Cy5.5, CD3-Pacific Blue, CD14-Pacific Blue, CD56-  
558 Pacific Blue, IgM-Pacific Blue, IgD-Pacific Blue, IgG-PE, CD27-PE-Cy7 (BD Biosciences)  
559 and the recombinant RBD-His described above. Two consecutive staining steps were  
560 conducted: the first one used an antibody and RBD cocktail incubation of 30 min at 4 °C; the  
561 second staining involved staining with anti-His-APC and anti-His-FITC antibodies (Abcam)  
562 at 4 °C for 30 min to detect the His tag of the RBD. The stained cells were washed and  
563 resuspended in PBS containing 2% FBS before being strained through a 70- $\mu$ m cell mesh  
564 filter (BD Biosciences). RBD-specific single B cells were gated as CD19<sup>+</sup>CD27<sup>+</sup>CD3<sup>-</sup>CD14<sup>-</sup>  
565 CD56<sup>-</sup>IgM<sup>-</sup>IgD<sup>-</sup>IgG<sup>+</sup>RBD<sup>+</sup> and sorted into 96-well PCR plates containing 10  $\mu$ L of RNAase-  
566 inhibiting RT-PCR catch buffer (1M Tris-HCl pH 8.0, RNase inhibitor, DEPC-treated water).  
567 Plates were then snap-frozen on dry ice and stored at -80 °C until the reverse transcription  
568 reaction.

569

#### 570 **Single B cell RT-PCR and antibody cloning**

571 Single memory B cells isolated from PBMCs of infected patients were cloned as previously  
572 described<sup>76</sup>. Briefly, one-step RT-PCR was performed on sorted single memory B cell with a  
573 gene specific primer mix, followed by nested PCR amplifications and sequencing using the  
574 heavy chain and light chain specific primers. Cloning PCR was then performed using heavy  
575 chain and light chain specific primers containing specific restriction enzyme cutting sites  
576 (heavy chain, 5'-AgeI/3'-SalI; kappa chain, 5'-AgeI/3'-BsiWI). The PCR products were  
577 purified and cloned into the backbone of antibody expression vectors containing the constant  
578 regions of human Ig $\gamma$ 1 or Ig $\alpha$ 1 and Ig $\alpha$ 2. The Ig $\alpha$ 1 and Ig $\alpha$ 2 vectors were purchased from  
579 InvivoGen (pfusess-hcha1 for IgA1 and pfusess-hcha2m1 for IgA2). The constructed  
580 plasmids containing paired heavy and light chain expression cassettes were co-transfected  
581 into 293T cells (ATCC) grown in 6-well plates. Antigen-specific ELISA and pseudovirus-  
582 based neutralization assays were used to analyze the binding capacity to SARS-CoV-2 RBD  
583 and the neutralization capacity of transfected culture supernatants, respectively.

584

#### 585 **Genetic analysis of the BCR repertoire**

586 Heavy chain and light chain germline assignment, framework region annotation,  
587 determination of somatic hypermutation (SHM) levels (in nucleotides) and CDR loop lengths

588 (in amino acids) were performed with the aid of the IMGT/HighV-QUEST software tool  
589 suite ([www.imgt.org/HighV-QUEST](http://www.imgt.org/HighV-QUEST)). Sequences were aligned using Clustal W in the  
590 BioEdit sequence analysis package (Version 7.2). Antibody clonotypes were defined as a set  
591 of sequences that share genetic V and J regions as well as an identical CDR3.

592

### 593 **Antibody production and purification**

594 The paired antibody VH/VL chains were cloned into Ig $\gamma$ , Ig $\alpha$ 1 or Ig $\alpha$ 2 and Igk expression  
595 vectors using T4 ligase (NEB). For production of IgG and monomeric IgA, the plasmids with  
596 paired heavy chain (IgG, IgA1, IgA2) and light chain genes were co-transfected into  
597 Expi293<sup>TM</sup> expression system (Thermo Fisher Scientific) following the manufacturer's  
598 protocol to produce recombinant monoclonal antibodies. For dIgA antibody production,  
599 plasmids of paired heavy chain (IgA1, IgA2) and kappa light chain together with a J chain  
600 were co-transfected into Expi293<sup>TM</sup> expression system (Thermo Fisher Scientific) at the ratio  
601 of 1:1:1 following the manufacturer's instructions. Antibodies produced from cell culture  
602 supernatants were purified immediately by affinity chromatography using recombinant  
603 Protein G-Agarose (Thermo Fisher Scientific) or CaptureSelect<sup>TM</sup> IgA Affinity Matrix  
604 (Thermo Fisher Scientific) according to the manufacturer's instructions, to purify IgG and  
605 IgA, respectively. The purified antibodies were concentrated by an Amicon ultracentrifuge  
606 filter device (molecular weight cut-off 10 kDa; Millipore) to a volume of 0.2 mL in PBS  
607 (Life Technologies), and then stored at 4 °C or -80 °C for further characterization.

608

### 609 **Size exclusion chromatography**

610 The prepacked HiLoad 26/60 Superdex<sup>TM</sup> 200pg (code No. 17-1071-01, Cytiva) column was  
611 installed onto the Amersham Biosciences AKTA FPLC system. After column equilibration  
612 with 2 column volumes (CV) of PBS, the concentrated IgA antibodies were applied onto the  
613 column using a 500- $\mu$ l loop at a flow rate of 2 mL/min. Dimers of IgA1 or IgA2 were  
614 separated from monomers upon washing with 2 CV of PBS. The milli-absorbance unit at  
615 OD280nm was recorded during the washing process. 2 mL-fractions were collected, pooled,  
616 concentrated and evaluated by western blot using mouse anti-IGJ monoclonal antibody  
617 [KT109] (Abcam) and rabbit anti-human IgA alpha chain antibody (Abcam).

618

### 619 **Pseudovirus-based neutralization assay**

620 The neutralizing activity of NABs was determined using a pseudotype-based neutralization  
621 assay as we previously described <sup>77</sup>. Briefly, The pseudovirus was generated by co-

622 transfection of 293T cells with pVax-1-S-COVID19 and pNL4-3Luc\_Env\_Vpr, carrying the  
623 optimized spike (S) gene (QHR63250) and a human immunodeficiency virus type 1  
624 backbone, respectively<sup>77</sup>. Viral supernatant was collected at 48 h post-transfection and frozen  
625 at -80 °C until use. The serially diluted monoclonal antibodies or sera were incubated with  
626 200 TCID<sub>50</sub> of pseudovirus at 37 °C for 1 hour. The antibody-virus mixtures were  
627 subsequently added to pre-seeded HEK 293T-ACE2 cells. 48 hours later, infected cells were  
628 lysed to measure luciferase activity using a commercial kit (Promega, Madison, WI). Half-  
629 maximal (IC<sub>50</sub>) or 90% (IC<sub>90</sub>) inhibitory concentrations of the evaluated antibody were  
630 determined by inhibitor vs. normalized response -- 4 Variable slope using GraphPad Prism 6  
631 or later (GraphPad Software Inc.).

632

### 633 **Neutralization activity of monoclonal antibodies against authentic SARS-CoV-2**

634 The SARS-CoV-2 focus reduction neutralization test (FRNT) was performed in a certified  
635 Biosafety level 3 laboratory. Neutralization assays against live SARS-CoV-2 were conducted  
636 using a clinical isolate (HKU-001a strain, GenBank accession no: MT230904.1) previously  
637 obtained from a nasopharyngeal swab from an infected patient<sup>78</sup>. The tested antibodies were  
638 serially diluted, mixed with 50 µL of SARS-CoV-2 (1×10<sup>3</sup> focus forming unit/mL, FFU/mL)  
639 in 96-well plates, and incubated for 1 hour at 37°C. Mixtures were then transferred to 96-well  
640 plates pre-seeded with 1×10<sup>4</sup>/well Vero E6 cells and incubated at 37°C for 24 hours. The  
641 culture medium was then removed and the plates were air-dried in a biosafety cabinet (BSC)  
642 for 20 mins. Cells were then fixed with a 4% paraformaldehyde solution for 30 min and air-  
643 dried in the BSC again. Cells were further permeabilized with 0.2% Triton X-100 and  
644 incubated with cross-reactive rabbit sera anti-SARS-CoV-2-N for 1 hour at RT before adding  
645 an Alexa Fluor 488 goat anti-rabbit IgG (H+L) cross-adsorbed secondary antibody (Life  
646 Technologies). The fluorescence density of SARS-CoV-2 infected cells were scanned using a  
647 Sapphire Biomolecular Imager (Azure Biosystems) and the neutralization effects were then  
648 quantified using Fiji software (NIH).

649

### 650 **Antibody binding kinetics, and competition with the ACE2 receptor measured by** 651 **Surface Plamon Resonance (SPR)**

652 The binding kinetics and affinity of recombinant monoclonal antibodies for the SARS-CoV-2  
653 spike protein (ACROBiosystems) were analysed by SPR (Biacore 8K, GE Healthcare).  
654 Specifically, the spike protein was covalently immobilized to a CM5 sensor chip via amine  
655 groups in 10mM sodium acetate buffer (pH 5.0) for a final RU around 500. SPR assays were



656 run at a flow rate of 30 mL/min in HEPES buffer. For conventional kinetic/dose-response,  
657 serial dilutions of monoclonal antibodies were injected across the spike protein surface for  
658 180s, followed by a 600s dissociation phase using a multi-cycle method. Remaining analytes  
659 were removed in the surface regeneration step with the injection of 10 mM glycine-HCl (pH  
660 2.0) for 2×30s at a flow rate of 30 µl/min. Kinetic analysis of each reference subtracted  
661 injection series was performed using the Biacore Insight Evaluation Software (GE  
662 Healthcare). All sensorgram series were fit to a 1:1 (Langmuir) binding model of interaction.  
663 Before evaluating the competition between antibodies and the human ACE2 peptidase  
664 domain, both the saturating binding concentrations of antibodies and of the ACE2 protein  
665 (ACROBiosystems) for the immobilized SARS-CoV-2 spike protein were determined  
666 separately. In the competitive assay, antibodies at the saturating concentration were injected  
667 onto the chip with immobilized spike protein for 120s until binding steady-state was reached.  
668 ACE2 protein also used at the saturating concentration was then injected for 120s, followed  
669 by another 120s of injection of antibody to ensure a saturation of the binding reaction against  
670 the immobilized spike protein. The differences in response units between ACE2 injection  
671 alone and prior antibody incubation reflect the antibodies' competitive ability against ACE2  
672 binding to the spike protein.

673

#### 674 **Hamster experiments**

675 *In vivo* evaluation of monoclonal antibody B8-IgG1, B8-mIgA1, B8-mIgA2, B8-dIgA1, B8-  
676 dIgA2 in the established golden Syrian hamster model of SARS-CoV-2 infection was  
677 performed as described previously, with slight modifications<sup>48</sup>. Approval was obtained from  
678 the University of Hong Kong (HKU) Committee on the Use of Live Animals in Teaching and  
679 Research. Briefly, 6-8-week-old male and female hamsters were housing with access to  
680 standard pellet feed and water *ad libitum* until live virus challenge in the BSL-3 animal  
681 facility. The hamsters were randomized from different litters into experimental groups.  
682 Experiments were performed in compliance with the relevant ethical regulations<sup>48</sup>. For  
683 prophylaxis studies, 24 hours before live virus challenge, three groups of hamsters were  
684 intraperitoneally or intranasally administered with one dose of test antibody in phosphate-  
685 buffered saline (PBS) at the indicated dose. At day 0, each hamster was intranasally  
686 inoculated with a challenge dose of 100 µL of Dulbecco's Modified Eagle Medium  
687 containing 10<sup>5</sup> PFU of SARS-CoV-2 (HKU-001a strain, GenBank accession no:  
688 MT230904.1) under anaesthesia with intraperitoneal ketamine (200 mg/kg) and xylazine (10  
689 mg/kg). For pre-treatment study, each hamster received one 1.5 mg/kg dose of intraperitoneal



690 B8-IgG1 at 24 , 48, 72 hours (n=4 per group) after virus challenge. The hamsters were  
691 monitored twice daily for clinical signs of disease. Syrian hamsters typically clear virus  
692 within one week after SARS-CoV-2 infection. Accordingly, animals were sacrificed for  
693 analysis at day 4 after virus challenge with high viral loads <sup>48</sup>. Half the nasal turbinate,  
694 trachea, and lung tissues were used for viral load determination by quantitative SARS-CoV-  
695 2-specific RdRp/HeI RT-qPCR assay <sup>28</sup> and infectious virus titration by plaque assay <sup>48</sup>.

696

### 697 **Cryo-EM sample preparation and data acquisition**

698 The purified SARS-CoV-2 S-B8 protein complexes were concentrated before being applied  
699 to the grids. Aliquots (4  $\mu$ L) of the protein complex were placed on glow-discharged holey  
700 carbon grids (Quantifoil Au R1.2/1.3, 300 mesh). The grids were blotted and flash-frozen in  
701 liquid ethane cooled by liquid nitrogen with a Vitrobot apparatus (Mark IV, ThermoFisher  
702 Scientific). The grids sample quality was verified with an FEI Talos Arctica 200-kV electron  
703 microscope (Thermo Fisher Scientific). The verified grids with optimal ice thickness and  
704 particle density were transferred to a Titan Krios operating at 300 kV and equipped with a Cs  
705 corrector, a Gatan K3 Summit detector (Gatan Inc.) and a GIF Quantum energy filter (slit  
706 width 20 eV). Micrographs were recorded in the super-resolution mode with a calibrated  
707 pixel size of 0.54895 Å. Each movie has a total accumulated exposure of 50 e-/Å<sup>2</sup>  
708 fractionated in 32 frames. The final image was binned 2-fold to a pixel size of 1.0979 Å.  
709 AutoEMation was used for the fully automated data collection. The defocus value of each  
710 image, which was set from -1.0 to -2.0  $\mu$ m during data collection, was determined by Gctf.  
711 Data collection statistics are summarized in Supplementary Table 11.

712

### 713 **Cryo-EM data processing**

714 The procedure for image processing of SARS-CoV-2 S-B8 complex is presented in  
715 Supplementary Fig. 2. In brief, Motion Correction (MotionCo2), CTF-estimation (GCTF) and  
716 non-templated particle picking (Gautomatch, <http://www.mrc-lmb.cam.ac.uk/kzhang/>) were  
717 automatically executed by the TsinghuaTitan.py program (developed by Dr. fang Yang).  
718 Sequential data processing was carried out on RELION 3.0 and RELION 3.1. Initially,  
719 2,436,776 particles were auto-picked by Gautomatch or RELION 3.0 from 4213 micrographs.  
720 After several 2D classifications, 1,451,176 particles were selected and applied for 3D  
721 classification with one class. Two different states were obtained after further 3D  
722 classification: 3 RBD in up conformation bound with B8 Fab (3u), and 2 up RBDs and 1  
723 down RBD with each bound to a B8 Fab (2u1d). 616,799 particles for the 2u1d state and

724 351,095 particles for the 3u state were subjected to 3D auto-refinement, yielding final  
725 resolutions at 3.21 Å and 3.06 Å, respectively. Further CTF refinement and Bayesian  
726 polishing improved the resolution to 2.65 Å (2u1d, C1 symmetry) and 2.67 Å (3u, C3  
727 symmetry) with better map quality. To improve the RBD-B8 portion map density, focused  
728 local search classification was applied for each RBD-B8 portion with an adapted soft mask.  
729 The best classes for each RBD-Fab portion were selected and yielded a final resolution at  
730 3.56 Å (RBD-Fab1, up), 3.34 Å (RBD-Fab2, up), 3.69 Å (RBD-Fab3, down), 3.87 Å (RBD-  
731 Fab3, up) from 479,305, 508,653, 656,429, and 136,482 particles, respectively. Further CTF  
732 refinement and Bayesian polishing improved the resolution of RBD-Fab2 to 3.11 Å with  
733 better map quality. RBD-Fab maps were fitted onto the whole structure map using Chimera,  
734 then combined using PHENIX combine\_focused\_maps. The reported resolutions were  
735 estimated with the gold-standard Fourier shell correlation (FSC) cutoff of 0.143 criterion.  
736 Data processing statistics are summarized in Supplementary Table 11.

737

### 738 **Model building and structure refinement**

739 The spike model (PDB code: 6VSB) and the initial model of the B8 Fab generated by  
740 SWISS-Model were fitted into the EM density map, and further manually adjusted with Coot.  
741 Glucosides were built manually with carbohydrate tool in Coot. The atomic models were  
742 refinement using Phenix in real space with secondary structure and geometry restraints. The  
743 final structures were validated using Phenix.molprobity. UCSF Chimera, ChimeraX and  
744 PyMol were used for map segmentation and figure generation. Model refinement statistics  
745 are summarized in Supplementary Table 11.

746

### 747 **SARS-CoV-2 infection of reconstructed human nasal epithelia**

748 MucilAir<sup>TM</sup>, corresponding to reconstructed human nasal epithelium cultures differentiated *in*  
749 *vitro* for at least 4 weeks, were purchased from Epithelix (Saint-Julien-en-Genevois, France).  
750 The cultures were generated from pooled nasal tissues obtained from 14 human adult donors.  
751 Cultures were maintained in air/liquid interface (ALI) conditions in transwells with 700 µL of  
752 MucilAir<sup>TM</sup> medium (Epithelix) in the basal compartment, and then kept at 37 °C under a 5%  
753 CO<sub>2</sub> atmosphere. SARS-CoV-2 infection was performed as previously described<sup>50</sup>. Briefly,  
754 the apical side of ALI cultures was washed 20 min at 37 °C in Mucilair<sup>TM</sup> medium to remove  
755 mucus. Cells were then incubated with 10<sup>4</sup> plaque-forming units (PFU) of the isolate  
756 BetaCoV/France/IDF00372/2020 (EVAg collection, Ref-SKU: 014V-03890; kindly provided  
757 by S. Van der Werf). The viral input was diluted in DMEM medium to a final volume 100 µL,

758 and then left on the apical side for 4 h at 37 °C. Control wells were mock treated with  
759 DMEM medium (Gibco) for the same duration. Viral inputs were removed by washing twice  
760 with 200 µL of PBS (5 min at 37 °C) and once with 200 µL Mucilair™ medium (20 min at  
761 37 °C). The basal medium was replaced every 2-3 days. Apical supernatants were harvested  
762 every 2-3 days by adding 200 µL of Mucilair™ medium on the apical side, with an  
763 incubation of 20 min at 37 °C prior to collection. For IgA treatment, cultures were washed  
764 once and then pretreated with antibodies added to the apical compartment for 1 h in 50µL.  
765 Viral input was then directly added to reach a final volume of 100 µL. The antibodies were  
766 added again at day 2 d.p.i. in the apical compartment during an apical wash (20 min at 37 °C).  
767 To test the effect of dIgA treatment in the presence of mucus, dIgA were added directly to the  
768 apical compartment of MucilAir™ cultures without an initial wash. After IgA treatment for  
769 1h, the virus was added directly to the IgA/mucus mixture and left on the apical side for 4h at  
770 37°C. After viral inoculation, a single brief wash was made to remove the viral input while  
771 limiting mucus loss. The cultures were then maintained as in the no-mucus condition.

772

### 773 **Viral RNA quantification in reconstructed human nasal epithelia**

774 Apical supernatants were collected, stored at -80 °C until thawing and were then diluted 4-  
775 fold in PBS in a 96-well plate. Diluted supernatants were inactivated for 20 min at 80 °C. For  
776 SARS-CoV-2 RNA quantification, 1 µL of diluted supernatant was added to 4 µL of PCR  
777 reaction mix. PCR was carried out in 384-well plates using the Luna Universal Probe One-  
778 Step RT-qPCR Kit (New England Biolabs) with SARS-CoV-2 NP-specific primers (Forward  
779 5'-TAA TCA GAC AAG GAA CTG ATT A-3'; Reverse 5'-CGA AGG TGT GAC TTC CAT  
780 G-3') on a QuantStudio 6 Flex thermocycler (Applied Biosystems). A standard curve was  
781 established in parallel using purified SARS-CoV-2 viral RNA.

782

### 783 **Histopathology and immunofluorescence (IF) staining**

784 The lung and nasal turbinate tissues collected at necropsy were fixed in zinc formalin and  
785 then processed into paraffin-embedded tissue blocks. The tissue sections (4 µm) were stained  
786 with hematoxylin and eosin (H&E) for light microscopy examination as previously described  
787 with modifications <sup>47</sup>. For identification and localization of SARS-CoV-2 nucleocapsid  
788 protein (NP) in organ tissues, immunofluorescence staining was performed on deparaffinized  
789 and rehydrated tissue sections using a rabbit anti-SARS-CoV-2-NP protein antibody together  
790 with an AF488-conjugated anti-rabbit IgG (Jackson ImmunoResearch, PA, USA). Briefly,  
791 the tissue sections were first treated with antigen unmasking solution (Vector Laboratories) in

792 a pressure cooker. After blocking with 0.1% Sudan black B for 15 min and 1% bovine serum  
793 albumin (BSA)/PBS at RT for 30 min, the primary rabbit anti-SARS-CoV-2-NP antibody  
794 (1:4000 dilution with 1% BSA/PBS) was incubated at 4°C overnight. This step was followed  
795 by incubation with a FITC-conjugated donkey anti-rabbit IgG (Jackson ImmunoResearch) for  
796 30 min and the sections were then mounted in medium with 4',6-diamidino-2-phenylindole  
797 (DAPI). For identification of DC-SIGN expression, we stained the NT slices with rabbit anti-  
798 DC-SIGN primary antibody (Abcam) and Alexa Fluor 488 goat anti-rabbit IgG (H+L) cross-  
799 adsorbed secondary antibody (Life Technologies) according to the manufacturer's  
800 instructions. For identification of ACE2 expression, the goat anti-ACE2 primary antibody  
801 (R&D) and Alexa Fluor 568 donkey anti-goat IgG (H+L) secondary antibodies (Invitrogen)  
802 according to the manufacturer's instructions. All tissue sections were examined, and the  
803 fluorescence images and whole section scanning were captured using 5×, 10× and 20×  
804 objectives with Carl Zeiss LSM 980. NP<sup>+</sup> cells per field were quantified based on the mean  
805 fluorescence intensity (MFI) using the ZEN BLACK 3.0 and ImageJ (NIH).

806

#### 807 **Effects of B8-dIgA on SARS-CoV-2 infection in HK2 cells**

808 HK2 cells were seeded into 24-well plates at the 40-50% confluency and cultured overnight.  
809 The B8-dIgA or control dIgA at the concentration of 1, 10, 100, 1000 ng/ml/mL and then  
810 mixed with SARS-CoV-2 (1:10 TCID<sub>50</sub>) and incubated for 1 hour at room temperature. The  
811 antibody/virus mixture was then added to HK2 cells after the cell culture medium was  
812 removed and washed with PBS once and incubated for 1 hour at 37°C. The infectious  
813 medium was replaced with fresh medium containing respective concentration of antibody  
814 after washing 3 times with PBS. 24 h later, the infected cells were imaged under fluorescence  
815 microscope after staining with AF488-conjugated anti-SARS-CoV-2 NP antibody.  
816 Alternatively, the infected cells were lysed and blotted for SARS-CoV-2 NP protein to  
817 determine the extent of infection. Tubulin was blotted as the internal control.

818

#### 819 **B8-dIgA mediated enhancement via CD209**

820 HEK293T cells were seeded into 10-cm dish at 40% confluency and cultured overnight. The  
821 HEK293T cells were transfected with human CD209 (Sino Biological) at 70%-90%  
822 confluency. The expression of CD209 was measured by flow cytometry. The transfected  
823 HEK293T-CD209 cells were seeded into 96-well plates with  $2.4 \times 10^4$  cells per well and  
824 cultured overnight. The HEK293T-CD209 cells were pre-treated with 10 ng/ml/mL of B8-  
825 dIgA or control dIgA and incubated for 6 h prior SARS-CoV-2 infection (MOI=0.05). 24 h

826 later, cells were then fixed with 4% paraformaldehyde solution for 30 min and air-dried in the  
827 BSC. Cells were further permeabilized with 0.2% Triton X-100 and incubated with cross-  
828 reactive rabbit sera anti-SARS-CoV-2-N for 1 hour at RT before adding Alexa Fluor 488 goat  
829 anti-rabbit IgG (H+L) cross-adsorbed secondary antibody (Life Technologies). The  
830 fluorescence density of SARS-CoV-2 infected cells was acquired using a Sapphire  
831 Biomolecular Imager (Azure Biosystems) and then the MFI of four randomly selected areas  
832 of each sample was quantified using Fiji software (NIH).

833

#### 834 **Effects of B8 antibodies on SARS-CoV-2 mediated cell-cell fusion**

835 Vero-E6 TMPRSS2 cells were seeded into 48-well plates and cultured overnight. After  
836 treatment with B8 antibodies at the dose of 3000 ng/ml/mL for 1 hour, HEK293T cells  
837 transfected with SARS-CoV-2 spike-GFP were added into the treated Vero-E6 TMPRSS2  
838 cells and co-cultured for 48 hours. The cell-cell fusion between Vero-E6 TMPRSS2 and  
839 HEK293T-Spike-GFP was then determined under a fluorescence microscope (Nikon ELIPSE)  
840 and the images of randomly selected region were captured using 4× and 10× objectives using  
841 the Nikon software.

842

#### 843 **Re-analysis of published nasal brushing single-cell data**

844 The preprocessed scRNA-seq data from nasal brushing samples of 2 healthy controls and 4  
845 COVID-19 patients were downloaded from Gene Expression Omnibus (GEO) database with  
846 accession numbers GSE171488 and GSE164547. Quality control metrics were consistent  
847 with the original article [PMID: 34003804] and performed based on the R package Seurat  
848 (version 4.0.3) [PMID: 34062119]. Harmony [PMID: 31740819] was used to integrate the  
849 samples based on the top 4000 most variable genes obtained with  
850 the FindVariableFeatures() function in Seurat. CD14<sup>+</sup> (monocyte) cells were extracted for  
851 further analysis. The annotation of the cell type was performed by manually checking the  
852 marker genes of each cluster identified from the FindAllMarkers() function in Seurat.

853

#### 854 **Quantification and statistical analysis**

855 Statistical analysis was performed using PRISM 6.0 or later. Ordinary one-way ANOVA and  
856 multiple comparisons were used to compare group means and differences between multiple  
857 groups. Unpaired Student's *t* tests were used to compare group means between two groups  
858 only. A P-value <0.05 was considered significant. The the number of independent  
859 experiments performed, the number of animals in each group, and the specific details of

860 statistical tests are reported in the figure legends and the Methods section.

861

## 862 **SUPPLEMENTAL INFORMATION**

863 The supplemental information includes 13 Tables and 9 Figures.

864

## 865 **ACKNOWLEDGMENTS**

866 We acknowledge financial supports from the Hong Kong Research Grants Council  
867 Collaborative Research Fund (C7156-20G to Z.C.); the National Key Research and  
868 Development Project of China (2020YFC0860600) and the National Program on Key  
869 Research Project of China (2020YFA0707500 and 2020YFA0707504); the Health and  
870 Medical Research Fund (COVID1903010-7), the Food and Health Bureau, The Government  
871 of the Hong Kong Special Administrative Region; Innovation and Technology Fund (ITF),  
872 The Government of the Hong Kong Special Administrative Region; the University  
873 Development Fund and Li Ka Shing Faculty of Medicine Matching Fund from the University  
874 of Hong Kong to the AIDS Institute; the Consultancy Service for Enhancing Laboratory  
875 Surveillance of Emerging Infectious Diseases and Research Capability on Antimicrobial  
876 Resistance for Department of Health of the Hong Kong Special Administrative Region  
877 Government; Sanming Project of Medicine in Shenzhen, China (SZSM201911014); the High  
878 Level-Hospital Program, Health Commission of Guangdong Province, China; the research  
879 project of Hainan academician innovation platform (YSPTZX202004); and the Hainan talent  
880 development project (SRC200003); L.A.C's team was supported by the Urgence COVID-19  
881 Fundraising Campaign of Institute Pasteur (TROPICORO project). The study was also  
882 supported by generous donations of the Friends of Hope Education Fund, Lee Wan Keung  
883 Charity Foundation Limited, Shaw Foundation Hong Kong, Michael Seak-Kan Tong,  
884 Richard Yu and Carol Yu, May Tam Mak Mei Yin, Hong Kong Sanatorium & Hospital, Hui  
885 Ming, Hui Hoy and Chow Sin Lan Charity Fund Limited, Chan Yin Chuen Memorial  
886 Charitable Foundation, Marina Man-Wai Lee, the Hong Kong Hainan Commercial  
887 Association South China Microbiology Research Fund, the Jessie & George Ho Charitable  
888 Foundation, Perfect Shape Medical Limited, Kai Chong Tong, Tse Kam Ming Laurence, Foo  
889 Oi Foundation Limited, Betty Hing-Chu Lee, Ping Cham So, and Lo Ying Shek Chi Wai  
890 Foundation. Z.C.'s team was also partly supported by the Theme-Based Research  
891 Scheme (T11-706/18-N to Z.C.).

892

## 893 **AUTHOR CONTRIBUTIONS**



894 Conceptualization, Z.C.; HuNAb cloning, Z.B.; experimental design, Z.C., Z.B., R.Z.,  
895 J.F.W.C.; hamster experiments, J.F.W.C., C.C.S.C., V.K.M.P., C.C.Y.C., K.K.H.C., and JC;  
896 cryoEM study, J.Z., J.G., Z.Y.W., X.W.; SPR experiments, Q.Z., S.S. and L.Z.; LL confocal  
897 imaging, L.L. and D.Z.; MucilAir™ experiment, R.R. and L.A.C.; HK-2 experiment, M.L.Y.;  
898 nasal cytology data analysis, M.Y. and R.S.; clinical specimens, K.K.W.T.; *in vitro*  
899 experiments, H.C., Z.D., K.K.A., H.H., H.O.M., J.C., C.L., J.Z.; manuscript preparation,  
900 Z.C., Z.B., R.Z., L.Z., K.Y.Y.; study supervision, Z.C., K.Y.Y. and L.Z.

901

## 902 **DECLARATION OF INTEREST**

903 J.F.W.C. has received travel grants from Pfizer Corporation Hong Kong and Astellas Pharma  
904 Hong Kong Corporation Limited and was an invited speaker for Gilead Sciences Hong Kong  
905 Limited and Luminex Corporation. The funding sources had no role in study design, data  
906 collection, analysis or interpretation or writing of the report. The other authors declare no  
907 conflicts of interest except for a provisional patent application filed for human monoclonal  
908 antibodies generated in our laboratory.

909

## 910 **Reporting Summary**

911 Further information on research design is available in the Nature Research Reporting  
912 Summary linked to this article.

913

## 914 **Data availability**

915 The data of this studies are available upon reasonable request and accession codes will be  
916 available before publication.

917

## 918 **Code availability**

919 No custom computer code or algorithm used to generate results that are reported in the paper  
920 and central to its main claims.

921

## 922 **REFERENCES**

- 923 1 Zhu, N. *et al.* A Novel Coronavirus from Patients with Pneumonia in China, 2019. *N*  
924 *Engl J Med* **382**, 727-733, doi:10.1056/NEJMoa2001017 (2020).
- 925 2 Zhou, P. *et al.* A pneumonia outbreak associated with a new coronavirus of probable  
926 bat origin. *Nature* **579**, 270-273, doi:10.1038/s41586-020-2012-7 (2020).
- 927 3 Wan, Y., Shang, J., Graham, R., Baric, R. S. & Li, F. Receptor recognition by novel  
928 coronavirus from Wuhan: An analysis based on decade-long structural studies of  
929 SARS. *J Virol* **94**, e00127-00120, doi:10.1128/JVI.00127-20 (2020).



- 930 4 Chan, J. F. *et al.* Genomic characterization of the 2019 novel human-pathogenic  
931 coronavirus isolated from a patient with atypical pneumonia after visiting Wuhan.  
932 *Emerg Microbes Infect* **9**, 221-236, doi:10.1080/22221751.2020.1719902 (2020).
- 933 5 Lu, G., Wang, Q. & Gao, G. F. Bat-to-human: spike features determining 'host jump'  
934 of coronaviruses SARS-CoV, MERS-CoV, and beyond. *Trends Microbiol* **23**, 468-  
935 478, doi:10.1016/j.tim.2015.06.003 (2015).
- 936 6 Shang, J. *et al.* Cell entry mechanisms of SARS-CoV-2. *Proc Natl Acad Sci U S A*  
937 **117**, 11727-11734, doi:10.1073/pnas.2003138117 (2020).
- 938 7 Belouzard, S., Millet, J. K., Licitra, B. N. & Whittaker, G. R. Mechanisms of  
939 coronavirus cell entry mediated by the viral spike protein. *Viruses* **4**, 1011-1033,  
940 doi:10.3390/v4061011 (2012).
- 941 8 Wang, Q. *et al.* Structural and Functional Basis of SARS-CoV-2 Entry by Using  
942 Human ACE2. *Cell* **181**, 894-904 e899, doi:10.1016/j.cell.2020.03.045 (2020).
- 943 9 Hoffmann, M. *et al.* SARS-CoV-2 Cell Entry Depends on ACE2 and TMPRSS2 and  
944 Is Blocked by a Clinically Proven Protease Inhibitor. *Cell* **181**, 271-280 e278,  
945 doi:10.1016/j.cell.2020.02.052 (2020).
- 946 10 Lan, J. *et al.* Structure of the SARS-CoV-2 spike receptor-binding domain bound to  
947 the ACE2 receptor. *Nature* **581**, 215-220, doi:10.1038/s41586-020-2180-5 (2020).
- 948 11 Walls, A. C. *et al.* Structure, Function, and Antigenicity of the SARS-CoV-2 Spike  
949 Glycoprotein. *Cell* **181**, 281-292 e286, doi:10.1016/j.cell.2020.02.058 (2020).
- 950 12 Yan, R. *et al.* Structural basis for the recognition of SARS-CoV-2 by full-length  
951 human ACE2. *Science* **367**, 1444-1448, doi:10.1126/science.abb2762 (2020).
- 952 13 Lu, R. *et al.* Genomic characterisation and epidemiology of 2019 novel coronavirus:  
953 implications for virus origins and receptor binding. *Lancet* **395**, 565-574,  
954 doi:10.1016/S0140-6736(20)30251-8 (2020).
- 955 14 Wu, F. *et al.* A new coronavirus associated with human respiratory disease in China.  
956 *Nature* **579**, 265-269, doi:10.1038/s41586-020-2008-3 (2020).
- 957 15 WHO. *Weekly epidemiological update on COVID-19 - 27 July 2021*,  
958 <https://www.who.int/publications/m/item/weekly-epidemiological-update-on-covid-19--27-july-2021>, (2021).
- 959
- 960 16 Cheng, V. C., Lau, S. K., Woo, P. C. & Yuen, K. Y. Severe acute respiratory  
961 syndrome coronavirus as an agent of emerging and reemerging infection. *Clin*  
962 *Microbiol Rev* **20**, 660-694, doi:10.1128/CMR.00023-07 (2007).
- 963 17 Rothe, C. *et al.* Transmission of 2019-nCoV Infection from an Asymptomatic Contact  
964 in Germany. *N Engl J Med* **382**, 970-971, doi:10.1056/NEJMc2001468 (2020).
- 965 18 Holshue, M. L. *et al.* First Case of 2019 Novel Coronavirus in the United States. *N*  
966 *Engl J Med* **382**, 929-936, doi:10.1056/NEJMoa2001191 (2020).
- 967 19 Chan, J. F. *et al.* A familial cluster of pneumonia associated with the 2019 novel  
968 coronavirus indicating person-to-person transmission: a study of a family cluster.  
969 *Lancet* **395**, 514-523, doi:10.1016/S0140-6736(20)30154-9 (2020).
- 970 20 Wang, D. *et al.* Clinical Characteristics of 138 Hospitalized Patients With 2019 Novel  
971 Coronavirus-Infected Pneumonia in Wuhan, China. *JAMA* **323**, 1061-1069,  
972 doi:10.1001/jama.2020.1585 (2020).
- 973 21 Johnson, B. A. *et al.* Loss of furin cleavage site attenuates SARS-CoV-2 pathogenesis.  
974 *Nature* **591**, 293-299, doi:10.1038/s41586-021-03237-4 (2021).
- 975 22 Wong, Y. C. *et al.* Natural transmission of bat-like SARS-CoV-2PRRA variants in  
976 COVID-19 patients. *Clin Infect Dis* **73**, e437-e444, doi:10.1093/cid/ciaa953 (2020).
- 977 23 Chu, H. *et al.* Host and viral determinants for efficient SARS-CoV-2 infection of the  
978 human lung. *Nat Commun* **12**, 134, doi:10.1038/s41467-020-20457-w (2021).

- 979 24 Gobeil, S. M. *et al.* D614G Mutation Alters SARS-CoV-2 Spike Conformation and  
980 Enhances Protease Cleavage at the S1/S2 Junction. *Cell Rep* **34**, 108630,  
981 doi:10.1016/j.celrep.2020.108630 (2021).
- 982 25 Korber, B. *et al.* Tracking Changes in SARS-CoV-2 Spike: Evidence that D614G  
983 Increases Infectivity of the COVID-19 Virus. *Cell* **182**, 812-827 e819,  
984 doi:10.1016/j.cell.2020.06.043 (2020).
- 985 26 Plante, J. A. *et al.* Spike mutation D614G alters SARS-CoV-2 fitness. *Nature* **592**,  
986 116-121, doi:10.1038/s41586-020-2895-3 (2020).
- 987 27 Hung, I. F. *et al.* SARS-CoV-2 shedding and seroconversion among passengers  
988 quarantined after disembarking a cruise ship: a case series. *Lancet Infect Dis* **20**,  
989 1051-1060, doi:10.1016/S1473-3099(20)30364-9 (2020).
- 990 28 Chan, J. F. *et al.* Improved Molecular Diagnosis of COVID-19 by the Novel, Highly  
991 Sensitive and Specific COVID-19-RdRp/Hel Real-Time Reverse Transcription-PCR  
992 Assay Validated In Vitro and with Clinical Specimens. *J Clin Microbiol* **58**, e00310-  
993 00320, doi:10.1128/JCM.00310-20 (2020).
- 994 29 To, K. K. *et al.* Temporal profiles of viral load in posterior oropharyngeal saliva  
995 samples and serum antibody responses during infection by SARS-CoV-2: an  
996 observational cohort study. *Lancet Infect Dis* **20**, 565-574, doi:10.1016/S1473-  
997 3099(20)30196-1 (2020).
- 998 30 Arvin, A. M. *et al.* A perspective on potential antibody-dependent enhancement of  
999 SARS-CoV-2. *Nature* **584**, 353-363, doi:10.1038/s41586-020-2538-8 (2020).
- 1000 31 Shi, R. *et al.* A human neutralizing antibody targets the receptor-binding site of  
1001 SARS-CoV-2. *Nature* **584**, 120-124, doi:10.1038/s41586-020-2381-y (2020).
- 1002 32 Zost, S. J. *et al.* Potently neutralizing and protective human antibodies against SARS-  
1003 CoV-2. *Nature* **584**, 443-449, doi:10.1038/s41586-020-2548-6 (2020).
- 1004 33 Liu, L. *et al.* Potent neutralizing antibodies against multiple epitopes on SARS-CoV-2  
1005 spike. *Nature* **584**, 450-456, doi:10.1038/s41586-020-2571-7 (2020).
- 1006 34 Cao, Y. *et al.* Potent Neutralizing Antibodies against SARS-CoV-2 Identified by  
1007 High-Throughput Single-Cell Sequencing of Convalescent Patients' B Cells. *Cell* **182**,  
1008 73-84 e16, doi:10.1016/j.cell.2020.05.025 (2020).
- 1009 35 Robbiani, D. F. *et al.* Convergent antibody responses to SARS-CoV-2 in convalescent  
1010 individuals. *Nature* **584**, 437-442, doi:10.1038/s41586-020-2456-9 (2020).
- 1011 36 Sun, Z. *et al.* Potent neutralization of SARS-CoV-2 by human antibody heavy-chain  
1012 variable domains isolated from a large library with a new stable scaffold. *MAbs* **12**,  
1013 1778435, doi:10.1080/19420862.2020.1778435 (2020).
- 1014 37 Wu, Y. *et al.* A noncompeting pair of human neutralizing antibodies block COVID-19  
1015 virus binding to its receptor ACE2. *Science* **368**, 1274-1278,  
1016 doi:10.1126/science.abc2241 (2020).
- 1017 38 Wu, Y. *et al.* Identification of Human Single-Domain Antibodies against SARS-CoV-  
1018 2. *Cell Host Microbe* **27**, 891-898 e895, doi:10.1016/j.chom.2020.04.023 (2020).
- 1019 39 Pilette, C., Ouadrhiri, Y., Godding, V., Vaerman, J. P. & Sibille, Y. Lung mucosal  
1020 immunity: immunoglobulin-A revisited. *Eur Respir J* **18**, 571-588,  
1021 doi:10.1183/09031936.01.00228801 (2001).
- 1022 40 Corthesy, B. Multi-faceted functions of secretory IgA at mucosal surfaces. *Front*  
1023 *Immunol* **4**, 185, doi:10.3389/fimmu.2013.00185 (2013).
- 1024 41 Ejemel, M. *et al.* A cross-reactive human IgA monoclonal antibody blocks SARS-  
1025 CoV-2 spike-ACE2 interaction. *Nat Commun* **11**, 4198, doi:10.1038/s41467-020-  
1026 18058-8 (2020).
- 1027 42 Sterlin, D. *et al.* IgA dominates the early neutralizing antibody response to SARS-  
1028 CoV-2. *Sci Transl Med* **13**, eabd2223, doi:10.1126/scitranslmed.abd2223 (2021).

- 1029 43 Drummer, H. E. *et al.* Dimeric IgA is a specific biomarker of recent SARS-CoV-2  
1030 infection. *medRxiv*, 2021.2006.2028.21259671, doi:10.1101/2021.06.28.21259671  
1031 (2021).
- 1032 44 Dos Santos, J. M. B. *et al.* In Nasal Mucosal Secretions, Distinct IFN and IgA  
1033 Responses Are Found in Severe and Mild SARS-CoV-2 Infection. *Front Immunol* **12**,  
1034 595343, doi:10.3389/fimmu.2021.595343 (2021).
- 1035 45 Smith, N. *et al.* Distinct systemic and mucosal immune responses during acute SARS-  
1036 CoV-2 infection. *Nat Immunol*, doi:10.1038/s41590-021-01028-7 (2021).
- 1037 46 Wang, Z. *et al.* Enhanced SARS-CoV-2 neutralization by dimeric IgA. *Sci Transl*  
1038 *Med* **13**, eabf1555, doi:10.1126/scitranslmed.abf1555 (2021).
- 1039 47 Zhou, D. *et al.* Robust SARS-CoV-2 infection in nasal turbinates after treatment with  
1040 systemic neutralizing antibodies. *Cell Host Microbe* **29**, 551-563,  
1041 doi:10.1016/j.chom.2021.02.019 (2021).
- 1042 48 Chan, J. F.-W. *et al.* Simulation of the clinical and pathological manifestations of  
1043 Coronavirus Disease 2019 (COVID-19) in golden Syrian hamster model: implications  
1044 for disease pathogenesis and transmissibility. *Clinical Infectious Diseases* **71**, 2428-  
1045 2446, doi:10.1093/cid/ciaa325 (2020).
- 1046 49 Yeung, M. L. *et al.* Soluble ACE2-mediated cell entry of SARS-CoV-2 via interaction  
1047 with proteins related to the renin-angiotensin system. *Cell* **184**, 2212-2228 e2212,  
1048 doi:10.1016/j.cell.2021.02.053 (2021).
- 1049 50 Robinot, R. *et al.* SARS-CoV-2 infection induces the dedifferentiation of multiciliated  
1050 cells and impairs mucociliary clearance. *Nat Commun* **12**, 4354, doi:10.1038/s41467-  
1051 021-24521-x (2021).
- 1052 51 Liu, L. *et al.* Spatiotemporal interplay of severe acute respiratory syndrome  
1053 coronavirus and respiratory mucosal cells drives viral dissemination in rhesus  
1054 macaques. *Mucosal Immunol* **9**, 1089-1101, doi:10.1038/mi.2015.127 (2016).
- 1055 52 Baumann, J., Park, C. G. & Mantis, N. J. Recognition of secretory IgA by DC-SIGN:  
1056 implications for immune surveillance in the intestine. *Immunol Lett* **131**, 59-66,  
1057 doi:10.1016/j.imlet.2010.03.005 (2010).
- 1058 53 Wang, R. *et al.* Analysis of SARS-CoV-2 variant mutations reveals neutralization  
1059 escape mechanisms and the ability to use ACE2 receptors from additional species.  
1060 *Immunity* **54**, 1611-1621 e1615, doi:10.1016/j.immuni.2021.06.003 (2021).
- 1061 54 Yang, L. *et al.* COVID-19 antibody therapeutics tracker: a global online database of  
1062 antibody therapeutics for the prevention and treatment of COVID-19. *Antib Ther* **3**,  
1063 205-212, doi:10.1093/abt/tbaa020 (2020).
- 1064 55 Watkins, J. D. *et al.* Anti-HIV IgA isotypes: differential virion capture and inhibition  
1065 of transcytosis are linked to prevention of mucosal R5 SHIV transmission. *AIDS* **27**,  
1066 F13-20, doi:10.1097/QAD.0b013e328360eac6 (2013).
- 1067 56 Merrill, W. W. *et al.* Free secretory component and other proteins in human lung  
1068 lavage. *Am Rev Respir Dis* **122**, 156-161, doi:10.1164/arrd.1980.122.1.156 (1980).
- 1069 57 Taylor, R. A. *et al.* PET/CT targeted tissue sampling reveals virus specific dIgA can  
1070 alter the distribution and localization of HIV after rectal exposure. *PLoS Pathog* **17**,  
1071 e1009632, doi:10.1371/journal.ppat.1009632 (2021).
- 1072 58 Beltramello, M. *et al.* The Human Immune Response to Dengue Virus Is Dominated  
1073 by Highly Cross-Reactive Antibodies Endowed with Neutralizing and Enhancing  
1074 Activity. *Cell Host & Microbe* **8**, 271-283, doi:10.1016/j.chom.2010.08.007 (2010).
- 1075 59 Bournazos, S. *et al.* Antibody fucosylation predicts disease severity in secondary  
1076 dengue infection. *Science* **372**, 1102-1105, doi:10.1126/science.abc7303 (2021).

- 1077 60 van Erp, E. A., Luytjes, W., Ferwerda, G. & van Kasteren, P. B. Fc-Mediated  
1078 Antibody Effector Functions During Respiratory Syncytial Virus Infection and  
1079 Disease. *Front Immunol* **10**, 548, doi:10.3389/fimmu.2019.00548 (2019).
- 1080 61 Wan, Y. *et al.* Molecular Mechanism for Antibody-Dependent Enhancement of  
1081 Coronavirus Entry. *J Virol* **94**, e02015-02019, doi:10.1128/JVI.02015-19 (2020).
- 1082 62 Liu, L. *et al.* Anti-spike IgG causes severe acute lung injury by skewing macrophage  
1083 responses during acute SARS-CoV infection. *JCI Insight* **4**, e123158,  
1084 doi:10.1172/jci.insight.123158 (2019).
- 1085 63 Haynes, B. F. *et al.* Prospects for a safe COVID-19 vaccine. *Sci Transl Med* **12**,  
1086 doi:10.1126/scitranslmed.abe0948 (2020).
- 1087 64 Larsen, M. D. *et al.* Afucosylated IgG characterizes enveloped viral responses and  
1088 correlates with COVID-19 severity. *Science* **371**, doi:10.1126/science.abc8378 (2021).
- 1089 65 Baum, A. *et al.* REGN-COV2 antibodies prevent and treat SARS-CoV-2 infection in  
1090 rhesus macaques and hamsters. *Science* **370**, 1110-1115, doi:10.1126/science.abe2402  
1091 (2020).
- 1092 66 Liu, Y. *et al.* An infectivity-enhancing site on the SARS-CoV-2 spike protein targeted  
1093 by antibodies. *Cell* **184**, 3452-3466 e3418, doi:10.1016/j.cell.2021.05.032 (2021).
- 1094 67 Soh, W. T. *et al.* The N-terminal domain of spike glycoprotein mediates SARS-CoV-  
1095 2 infection by associating with L-SIGN and DC-SIGN. *bioRxiv*,  
1096 2020.2011.2005.369264, doi:10.1101/2020.11.05.369264 (2020).
- 1097 68 Geijtenbeek, T. B. H. *et al.* DC-SIGN, a dendritic cell-specific HIV-1-binding protein  
1098 that enhances trans-infection of T cells. *Cell* **100**, 587-597, doi:Doi 10.1016/S0092-  
1099 8674(00)80694-7 (2000).
- 1100 69 Bracq, L., Xie, M., Benichou, S. & Bouchet, J. Mechanisms for Cell-to-Cell  
1101 Transmission of HIV-1. *Front Immunol* **9**, 260, doi:10.3389/fimmu.2018.00260  
1102 (2018).
- 1103 70 Yang, D. *et al.* Attenuated Interferon and Proinflammatory Response in SARS-CoV-  
1104 2-Infected Human Dendritic Cells Is Associated With Viral Antagonism of STAT1  
1105 Phosphorylation. *J Infect Dis* **222**, 734-745, doi:10.1093/infdis/jiaa356 (2020).
- 1106 71 Thepaut, M. *et al.* DC/L-SIGN recognition of spike glycoprotein promotes SARS-  
1107 CoV-2 trans-infection and can be inhibited by a glycomimetic antagonist. *PLoS*  
1108 *Pathog* **17**, e1009576, doi:10.1371/journal.ppat.1009576 (2021).
- 1109 72 Hartmann, E. *et al.* Analysis of plasmacytoid and myeloid dendritic cells in nasal  
1110 epithelium. *Clin Vaccine Immunol* **13**, 1278-1286, doi:10.1128/CVI.00172-06 (2006).
- 1111 73 Ahn, J. H. *et al.* Nasal ciliated cells are primary targets for SARS-CoV-2 replication  
1112 in the early stage of COVID-19. *J Clin Invest* **131**, e148517, doi:10.1172/JCI148517  
1113 (2021).
- 1114 74 Krammer, F. SARS-CoV-2 vaccines in development. *Nature* **586**, 516-527,  
1115 doi:10.1038/s41586-020-2798-3 (2020).
- 1116 75 Kong, L. *et al.* Key gp120 Glycans Pose Roadblocks to the Rapid Development of  
1117 VRC01-Class Antibodies in an HIV-1-Infected Chinese Donor. *Immunity* **44**, 939-950,  
1118 doi:10.1016/j.immuni.2016.03.006 (2016).
- 1119 76 Smith, K. *et al.* Rapid generation of fully human monoclonal antibodies specific to a  
1120 vaccinating antigen. *Nat Protoc* **4**, 372-384, doi:10.1038/nprot.2009.3 (2009).
- 1121 77 Poeran, J., Zhong, H., Wilson, L., Liu, J. & Memtsoudis, S. G. Cancellation of  
1122 elective surgery and intensive care unit capacity in New York state: a retrospective  
1123 cohort analysis. *Anesth Analg* **131**, 1337-1341, doi:10.1213/ANE.0000000000005083  
1124 (2020).
- 1125 78 Chu, H. *et al.* Comparative tropism, replication kinetics, and cell damage profiling of  
1126 SARS-CoV-2 and SARS-CoV with implications for clinical manifestations,



1127 transmissibility, and laboratory studies of COVID-19: an observational study. *The*  
1128 *Lancet Microbe* **1**, e14-e23, doi:10.1016/S2666-5247(20)30004-5 (2020).  
1129

## 1130 **FIGURE LEGENDS**

1131

1132 **Fig. 1. Isolation of monoclonal antibodies from single B cells of convalescent COVID-19**  
1133 **patients.**

1134 **(A)** RBD-specific binding activities of sera derived from 3 (P1-P3) convalescent and 1 (P4)  
1135 acute COVID-19 patients as measured by ELISA.

1136 **(B)** Spike-specific binding activities of sera derived from four COVID-19 patients as  
1137 measured by ELISA.

1138 **(C)** Neutralization activities of sera derived from four COVID-19 patients as measured by  
1139 pseudotyped SARS-CoV-2 inhibition in 293T-ACE2 cells.

1140 **(D)** Antibody gene repertoire analysis of reactive B cells derived from each patient. The  
1141 number of cloned antibody genes from each patient is shown in the center of each pie chart  
1142 for both the heavy (H) and light (L) chains. The colors represent specific variable gene family.  
1143 Each fragment of the same color stands for one specific sub-family.

1144 **(E).** The percentage of somatic hypermutation (SHM) compared to germline sequences and  
1145 the CDR3 amino acid lengths of cloned antibody H and L gene sequences were analyzed for  
1146 each subject.

1147 **(F)** RBD (left) and spike (right) specific binding activities of five HuNAbs, including A6, B4,  
1148 B7, B8 and C5, were measured by ELISA.

1149 **(G)** Neutralization activities of 5 HuNAbs against pseudotyped (left) and authentic (right)  
1150 SARS-CoV-2 were determined in HEK 293T-ACE2 and Vero-E6 cells, respectively. HIV-1  
1151 specific HuNAb VRC01 served as a negative control. Each assay was performed in  
1152 duplicates and the mean of replicates is shown with the standard error of mean (SEM).

1153 **(H)** The competition of four HuNAbs, including B4, B7, B8 and C5, with human soluble  
1154 ACE2 for binding to SARS-CoV-2 RBD was measured by SPR. The curves show binding of  
1155 ACE2 to SARS-CoV-2 RBD with (red) or without (black) pre-incubation with each HuNAb.

1156

1157 **Fig. 2. Pre- and post-exposure treatment of B8-IgG1 against SARS-CoV-2 in Syrian**  
1158 **Hamster.**

1159 (A) Experimental schedule. Four groups of hamsters (G1-G4) received intraperitoneally a  
1160 single dose of 1.5 mg/kg of B8-IgG1 at one day before infection (-1 dpi) for pre-exposure  
1161 prophylaxis, and at day one (1 dpi), two (2 dpi) and three (3 dpi) post-infection for early  
1162 treatment, respectively.

1163 Control hamsters (G0, n=4) received an isotypic control antibody at the same dose. On day 0,  
1164 each hamster was intranasally challenged with a dose of  $10^5$  PFU of SARS-CoV-2 (HKU-  
1165 001a strain). All hamsters were sacrificed on 4 dpi for analysis.

1166 (B) Infectious virus (PFU) was measured in animal lungs by the viral plaque assay in Vero-  
1167 E6 cells. The PFU/ml concentration is shown in log-transformed units.

1168 (C) The relative viral RdRp RNA copies (normalized to  $\beta$ -actin) were determined by RT-  
1169 PCR in animal lungs.

1170 (D) Representative 100 $\times$  images of infected lungs from each group, as determined by anti-NP  
1171 immunofluorescence (IF) staining. The cell nuclei were counterstained with DAPI (blue).

1172 (E) Infectious virus (PFU) were measured in NT homogenates by the viral plaque assay as  
1173 mentioned above.

1174 (F) Viral loads in NT homogenates of each group were determined by RT-PCR assay. The  
1175 viral load data is shown in log-transformed units.

1176 (G) Representative 100 $\times$  images of infected NT from each group as determined by anti-NP IF  
1177 staining as mentioned above.

1178 Statistics were generated using one-way ANOVA tests. \* $p$ <0.05; \*\* $p$ <0.01; \*\*\* $p$ <0.001.

1179

1180 **Fig. 3. Pre-exposure treatment with monomeric B8-mIgA1 or B8-mIgA2 against SARS-**  
1181 **CoV-2 infection in Syrian hamsters.**

1182 (A) Experimental schedule. Five groups of hamsters (n=4 per group) received a single dose  
1183 of 4.5 mg/kg of B8-IgG1, B8-mIgA1 or B8-mIgA2 one day before viral challenge for pre-  
1184 exposure prophylaxis by the intranasal route (circles) or the intraperitoneal route (triangles),  
1185 respectively. Control hamsters (n=4) received PBS. On day 0, each hamster was intranasally  
1186 challenged with a dose of  $10^5$  PFU of SARS-CoV-2, as mentioned in Fig. 2A. All hamsters  
1187 were sacrificed on 4 dpi for analysis.

1188 (B) The viral RNA load, measured by relative RdRp RNA copy numbers (normalized to  $\beta$ -  
1189 actin) was determined by RT-PCR in animal lung homogenates.

1190 (C) The relative sub-genomic nucleocapsid (sgNP) RNA copy numbers (normalized to  $\beta$ -  
1191 actin) were determined by RT-PCR in animal lung homogenates.

1192 **(D)** Infectious virus (PFU) was measured in animal lung homogenates by the viral plaque  
1193 assay in Vero-E6 cells.

1194 **(E)** Representative lung images of infected animals by scanning whole tissue section. The  
1195 signal of SARS-CoV-2 NP was shown in bright spots.

1196 **(F)** The relative viral RdRp RNA copy numbers (normalized to  $\beta$ -actin) were determined by  
1197 RT-PCR in NT homogenates.

1198 **(G)** The relative sgNP RNA copy numbers (normalized to  $\beta$ -actin) were determined by RT-  
1199 PCR in NT homogenates.

1200 **(H)** Infectious virus (PFU) was measured in animal NT homogenates by the viral plaque  
1201 assay in Vero-E6 cells.

1202 **(I)** Representative NT images of infected animals by scanning whole tissue section. The  
1203 signal of SARS-CoV-2 NP was shown in bright spots.

1204 Log-transformed units are shown in **(B) to (H)** except in **(E)**. Statistics were generated using  
1205 one-way ANOVA tests. \* $p$ <0.05; \*\* $p$ <0.01.

1206

1207 **Fig. 4. Pre-exposure treatment with dimeric B8-dIgA enhances SARS-CoV-2 infection**  
1208 **in Syrian hamsters.**

1209 **(A)** Experimental schedule. Four groups of hamsters (n=4 per group) were inoculated  
1210 intranasally with B8-dIgA1 or B8-dIgA2, either at a low dose of 4.5 mg/kg or at a high dose  
1211 of 13.5 mg/kg, respectively, 12 hours before intranasal viral challenge. Another group of  
1212 hamsters (n=4) received PBS as control. On day 0, each hamster was intranasally challenged  
1213 with a dose of  $10^5$  PFU of SARS-CoV-2 as described in Fig. 2A. All hamsters were  
1214 sacrificed on 4 dpi for analysis. Data represent a presentative experiment from three  
1215 independent experiments.

1216 **(B)** The relative viral RdRp RNA copy numbers (normalized to  $\beta$ -actin) were determined by  
1217 RT-PCR in animal lung homogenates.

1218 **(C)** The relative viral sgNP RNA copy numbers (normalized to  $\beta$ -actin) were determined by  
1219 RT-PCR in animal lung homogenates.

1220 **(D)** Infectious virus (PFU) was measured in animal lung homogenates by the viral plaque  
1221 assay in Vero-E6 cells.

1222 **(E)** Representative lung images of infected animals by scanning whole tissue section. The  
1223 signal of SARS-CoV-2 NP was shown in bright spots.



1224 **(F)** The relative viral RdRp RNA copy numbers (normalized to  $\beta$ -actin) were determined by  
1225 RT-PCR in NT homogenates.

1226 **(G)** The relative viral sgNP RNA copies (normalized to  $\beta$ -actin) were determined by RT-  
1227 PCR in NT homogenates.

1228 **(H)** Infectious virus (PFU) was measured in NT homogenates by the viral plaque assay in  
1229 Vero-E6 cells.

1230 **(I)** Representative NT images of infected animals by scanning whole tissue section. The  
1231 signal of SARS-CoV-2 NP was shown in bright spots.

1232 Log-transformed units are shown in **(B) to (H)** except in **(E)**. Statistics were generated using  
1233 one-way ANOVA tests. \* $p < 0.05$ ; \*\* $p < 0.01$ .

1234

1235 **Fig. 5. B8-dIgA1 and B8-dIgA2 enhance SARS-CoV-2 infection via CD209.**

1236 **(A)** The effects of B8-dIgA2 on SARS-CoV-2 infection in the MucilAir<sup>TM</sup> model, consisting  
1237 of primary human nasal epithelial cells but no DCs. B8-mIgA2 or B8-dIgA2 were pre-  
1238 incubated at doses of 10, 100, and 1000 ng/ml, respectively, in the apical compartment with  
1239 or without mucus for 1 hour, before adding  $10^4$  PFU of SARS-CoV-2  
1240 (BetaCoV/France/IDF00372/2020) for 4 hours. The viral RNA loads were measured by RT-  
1241 PCR in both the apical and basal compartments and are shown in log-transformed units.

1242 **(B)** Representative confocal images (400 $\times$ ) of olfactory epithelium in NT showed the  
1243 expression of CD209 (DC-SIGN) in green and ACE2 in magenta by immunohistochemical  
1244 staining of experimental hamsters treated with B8-dIgA2 without (left) or with (middle and  
1245 right) SARS-CoV-2 infection. Color-coding indicates specific antibodies used for double  
1246 staining. Infected CD209<sup>+</sup> cells are visualized in yellow as indicated by arrows (right).

1247 **(C)** The CD209 or CD299 overexpressed-HEK 293T cells were pre-treated for 6 hours with  
1248 10 ng/ml of B8-dIgA1 or B8-dIgA2 or control dIgA1 or control dIgA2 or PBS, respectively,  
1249 prior to SARS-CoV-2 infection (MOI: 0.05). Two days after infection, SARS-CoV-2 NP  
1250 expression (green) was quantified by the mean fluorescence intensity (MFI) after anti-NP IF  
1251 staining. Statistics were generated using student-*t* tests. \* $p < 0.05$ ; \*\* $p < 0.01$ ; \*\*\* $p < 0.001$ .

1252 **(D)** The effects of B8 antibodies on cell-cell fusion. 293T cells co-transfected with SARS-  
1253 CoV-2 spike and GFP were pre-treated with 100 $\times$  the IC<sub>90</sub> dose of B8-IgG1, B8-mIgA1, B8-  
1254 mIgA2, B8-dIgA1, B8-dIgA2 or and IgG isotypic control for 1 hour, respectively. Vero-E6  
1255 cells transfected with TMPRSS2 were then added to the treated 293T-spike-GFP cells and

1256 co-cultured for 48 hours. Cell-cell fusion was imaged under a fluorescence confocal  
1257 microscope at the 50× magnification.

1258

1259 **Fig. 6. Cryo-EM structures of the SARS-CoV-2 S trimer in complex with B8-Fabs.**

1260 (A) Side and top views of the Spike-B8 3u cryo-EM map showing 3 up RBDs each bound  
1261 with a B8 Fab. Protomer 1, 2, and 3 are shown in slate blue, dark sea green, and India red,  
1262 respectively. Heavy chain and light chain of the B8-Fab are in blue and gold, respectively.  
1263 This color scheme was used throughout panels (A)-(E).

1264 (B) Side and top views of the Spike-B8 3u cryo atomic model.

1265 (C) Side and top views of the Spike-B8 2u1d cryo-EM map showing two up RBDs up (RBD-  
1266 1 and RBD-2) and one RBD down (RBD-3), each bound to a B8-Fab.

1267 (D) Side and top views of the Spike-B8 2u1d cryo atomic model.

1268 (E) Structural comparison of RBDs between Spike-B8 3u (different colors) and Spike-B8  
1269 2u1d (gray).

1270 (F) ACE2 (chocolate color, PDB: 6M0J) may clash with the heavy chain (blue) and light  
1271 chain (gold) of the B8-Fab. ACE2 and the Fab share overlapping epitopes on the RBM  
1272 (dotted black circle), and the framework of the B8-VL appears to clash with ACE2 (dotted  
1273 black frame). The RBD core and RBM are shown in light sky blue and green, respectively.

1274 (G) Atomic model of an RBD-B8 complex portion in cartoon mode, shown with the same  
1275 color scheme as in (F).

1276 (H) The residues involved in interactions between B8 and the RBM. The heavy and light  
1277 chain of the B8-Fab are in blue and gold, respectively. The RBM is shown in green.

# Fig. 1

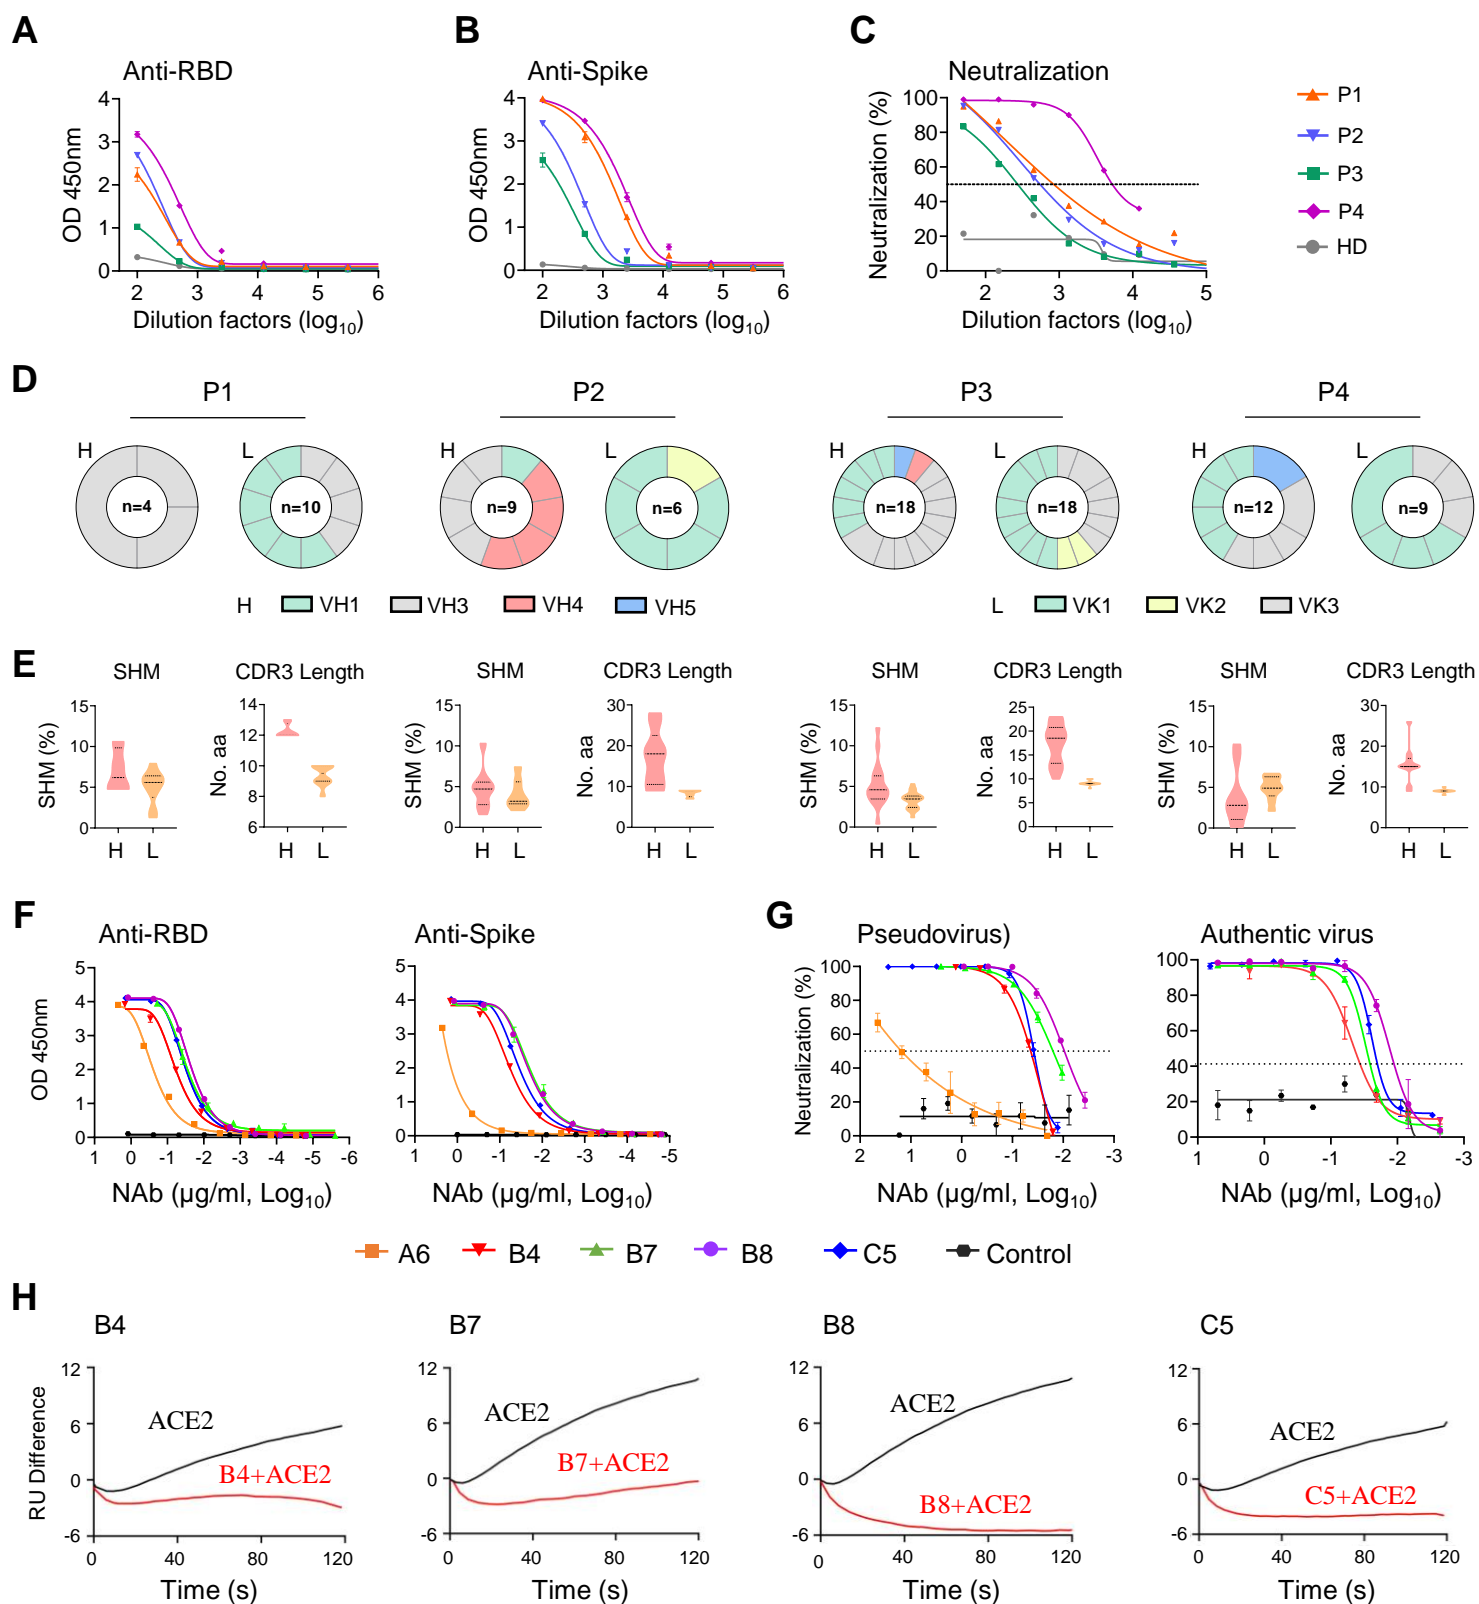

## Fig. 2

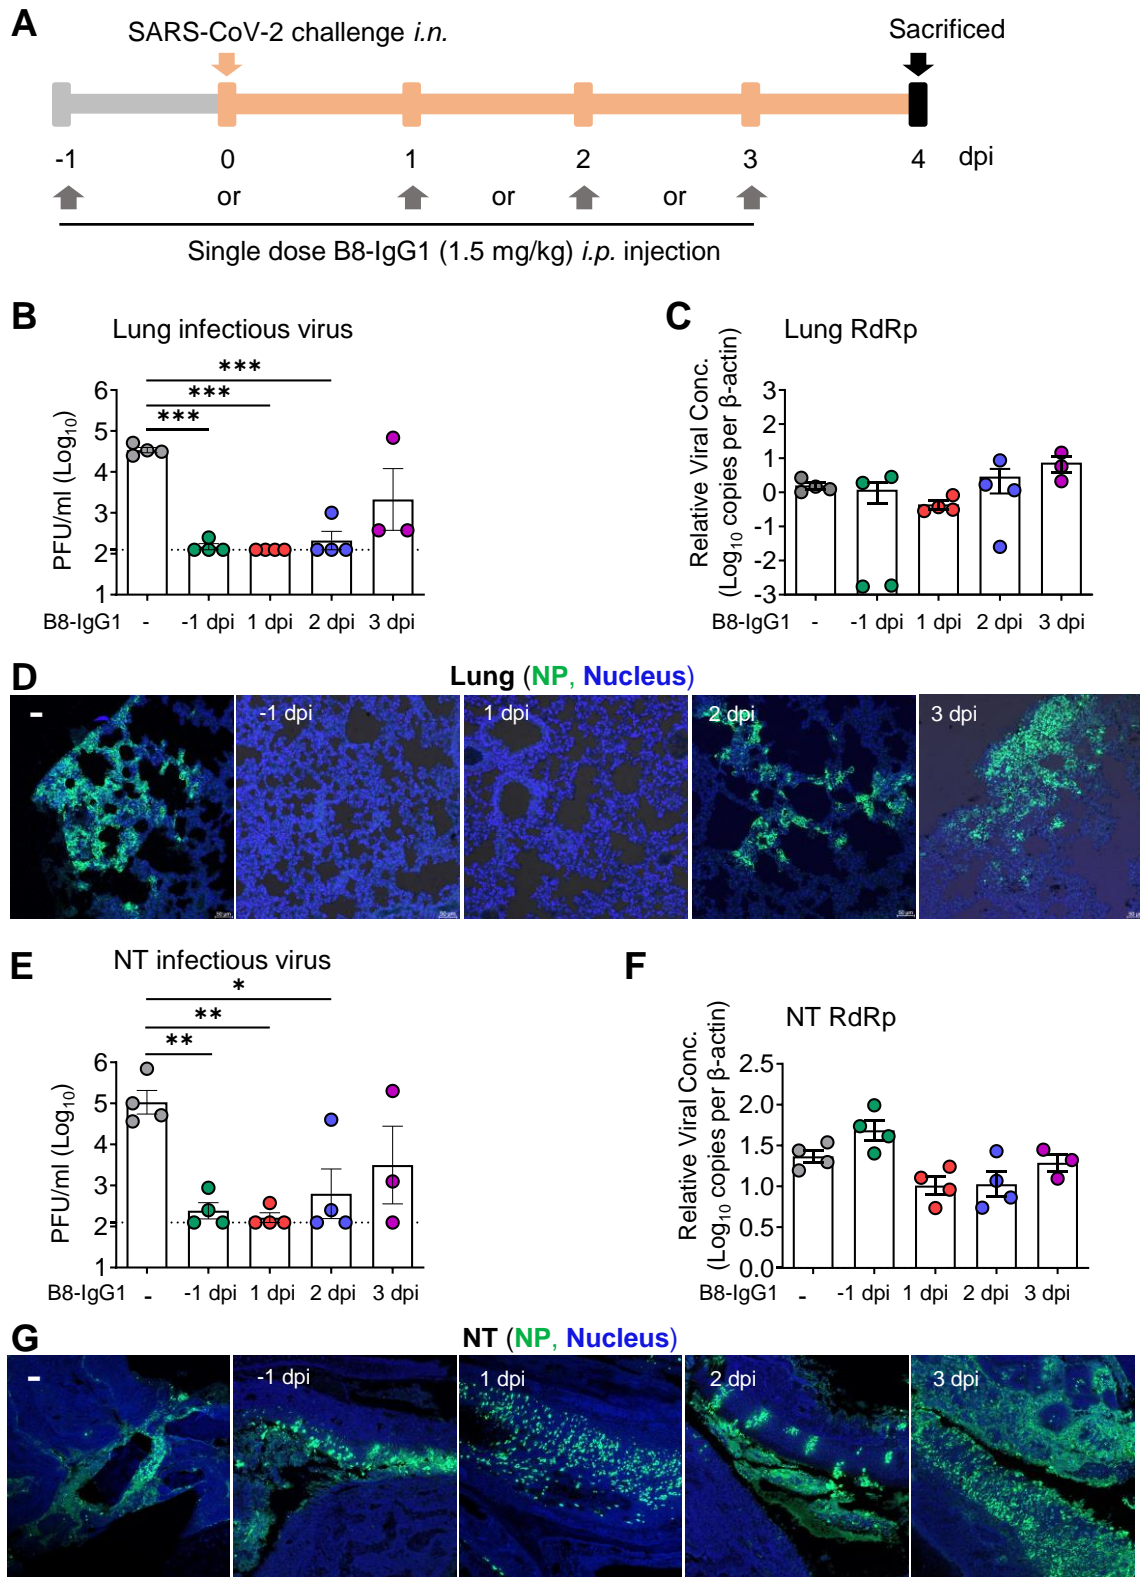

# Fig. 3

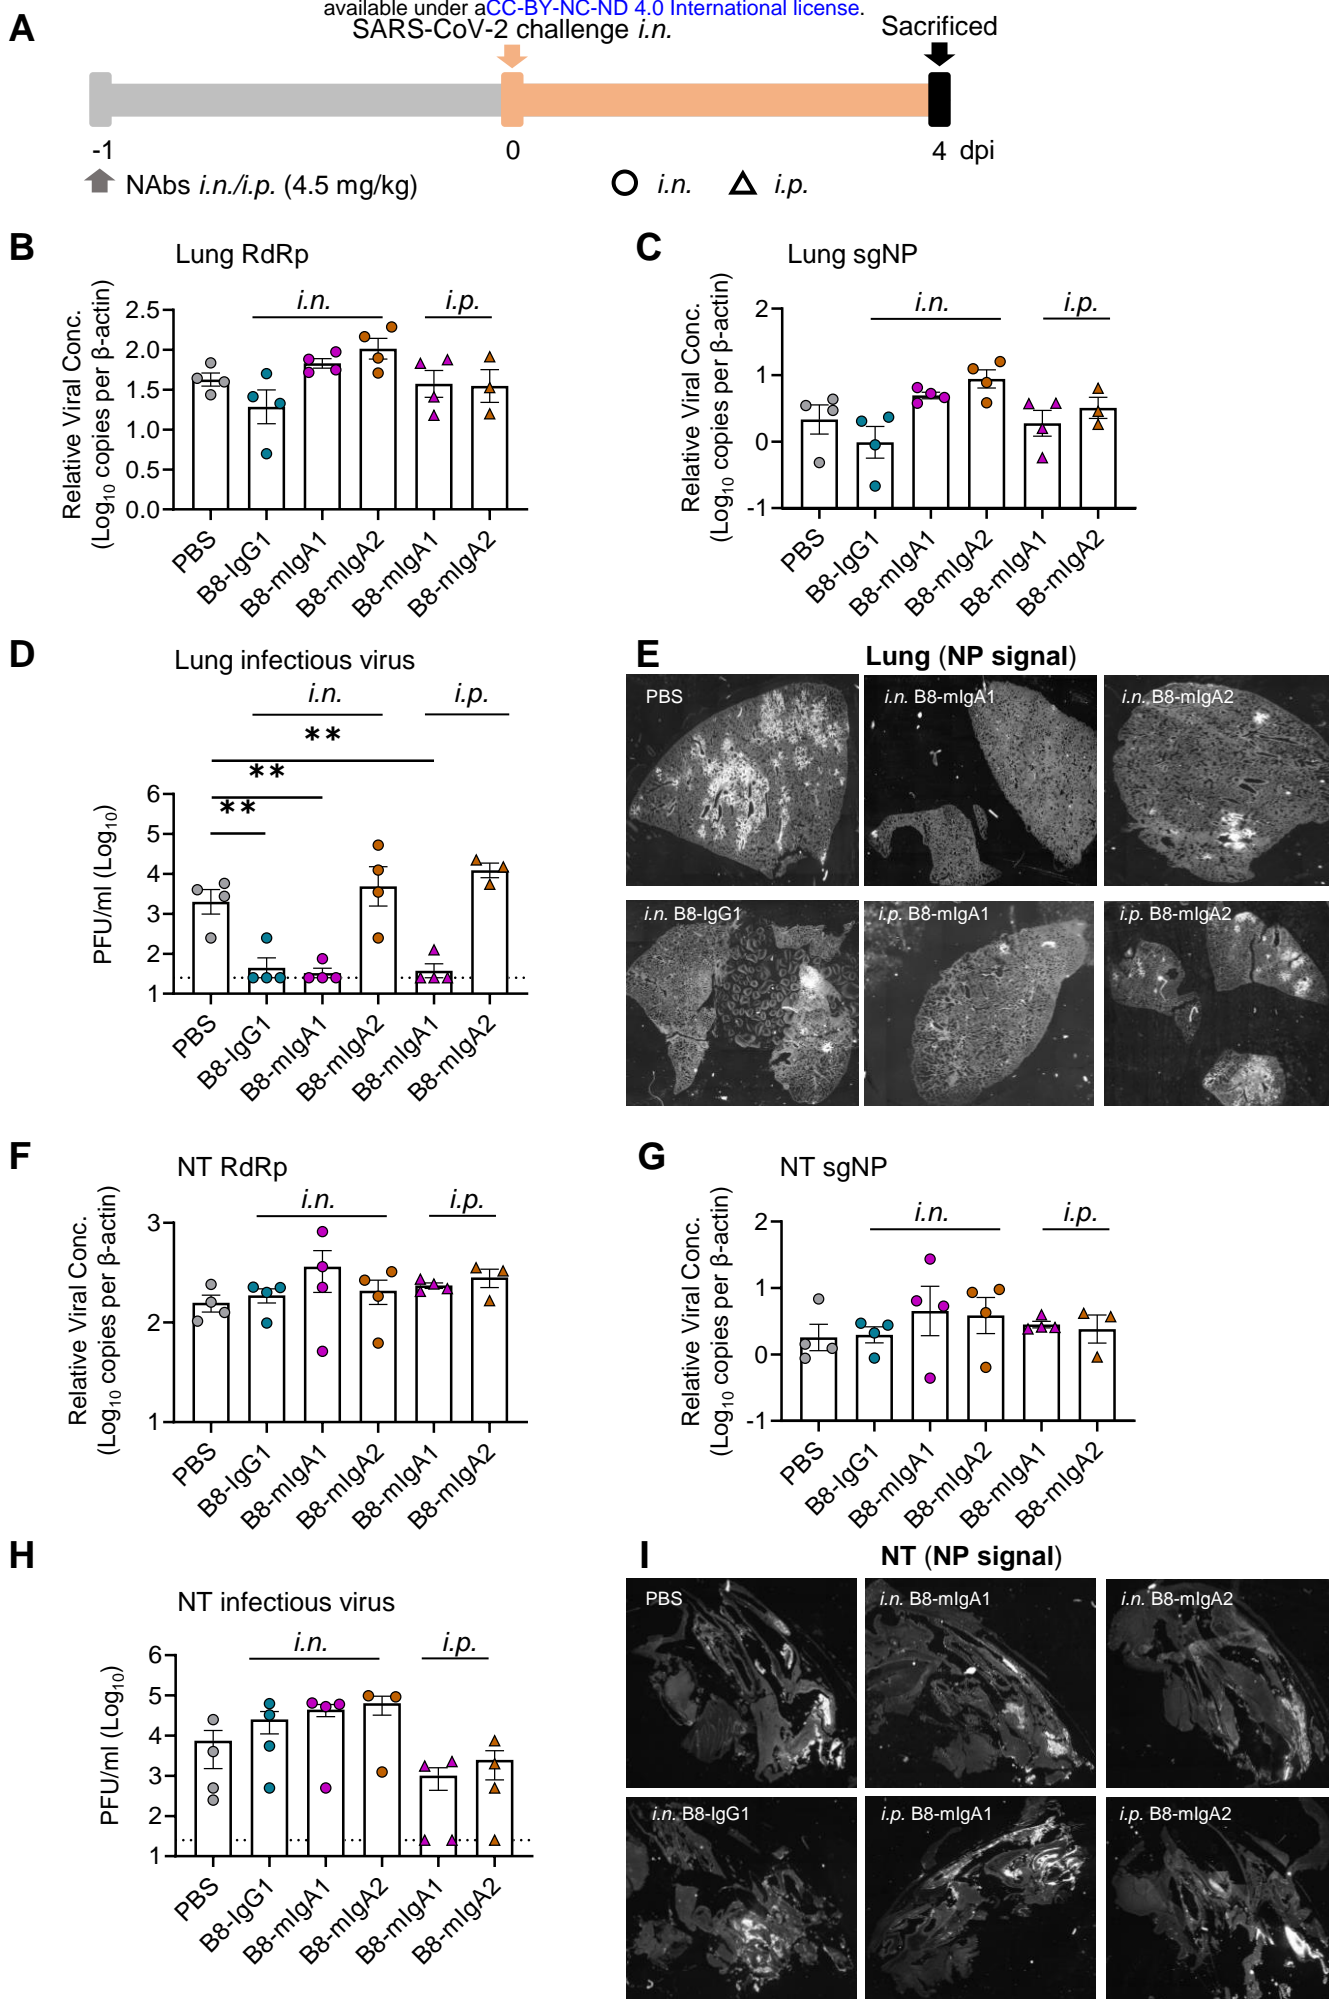



# Fig. 4

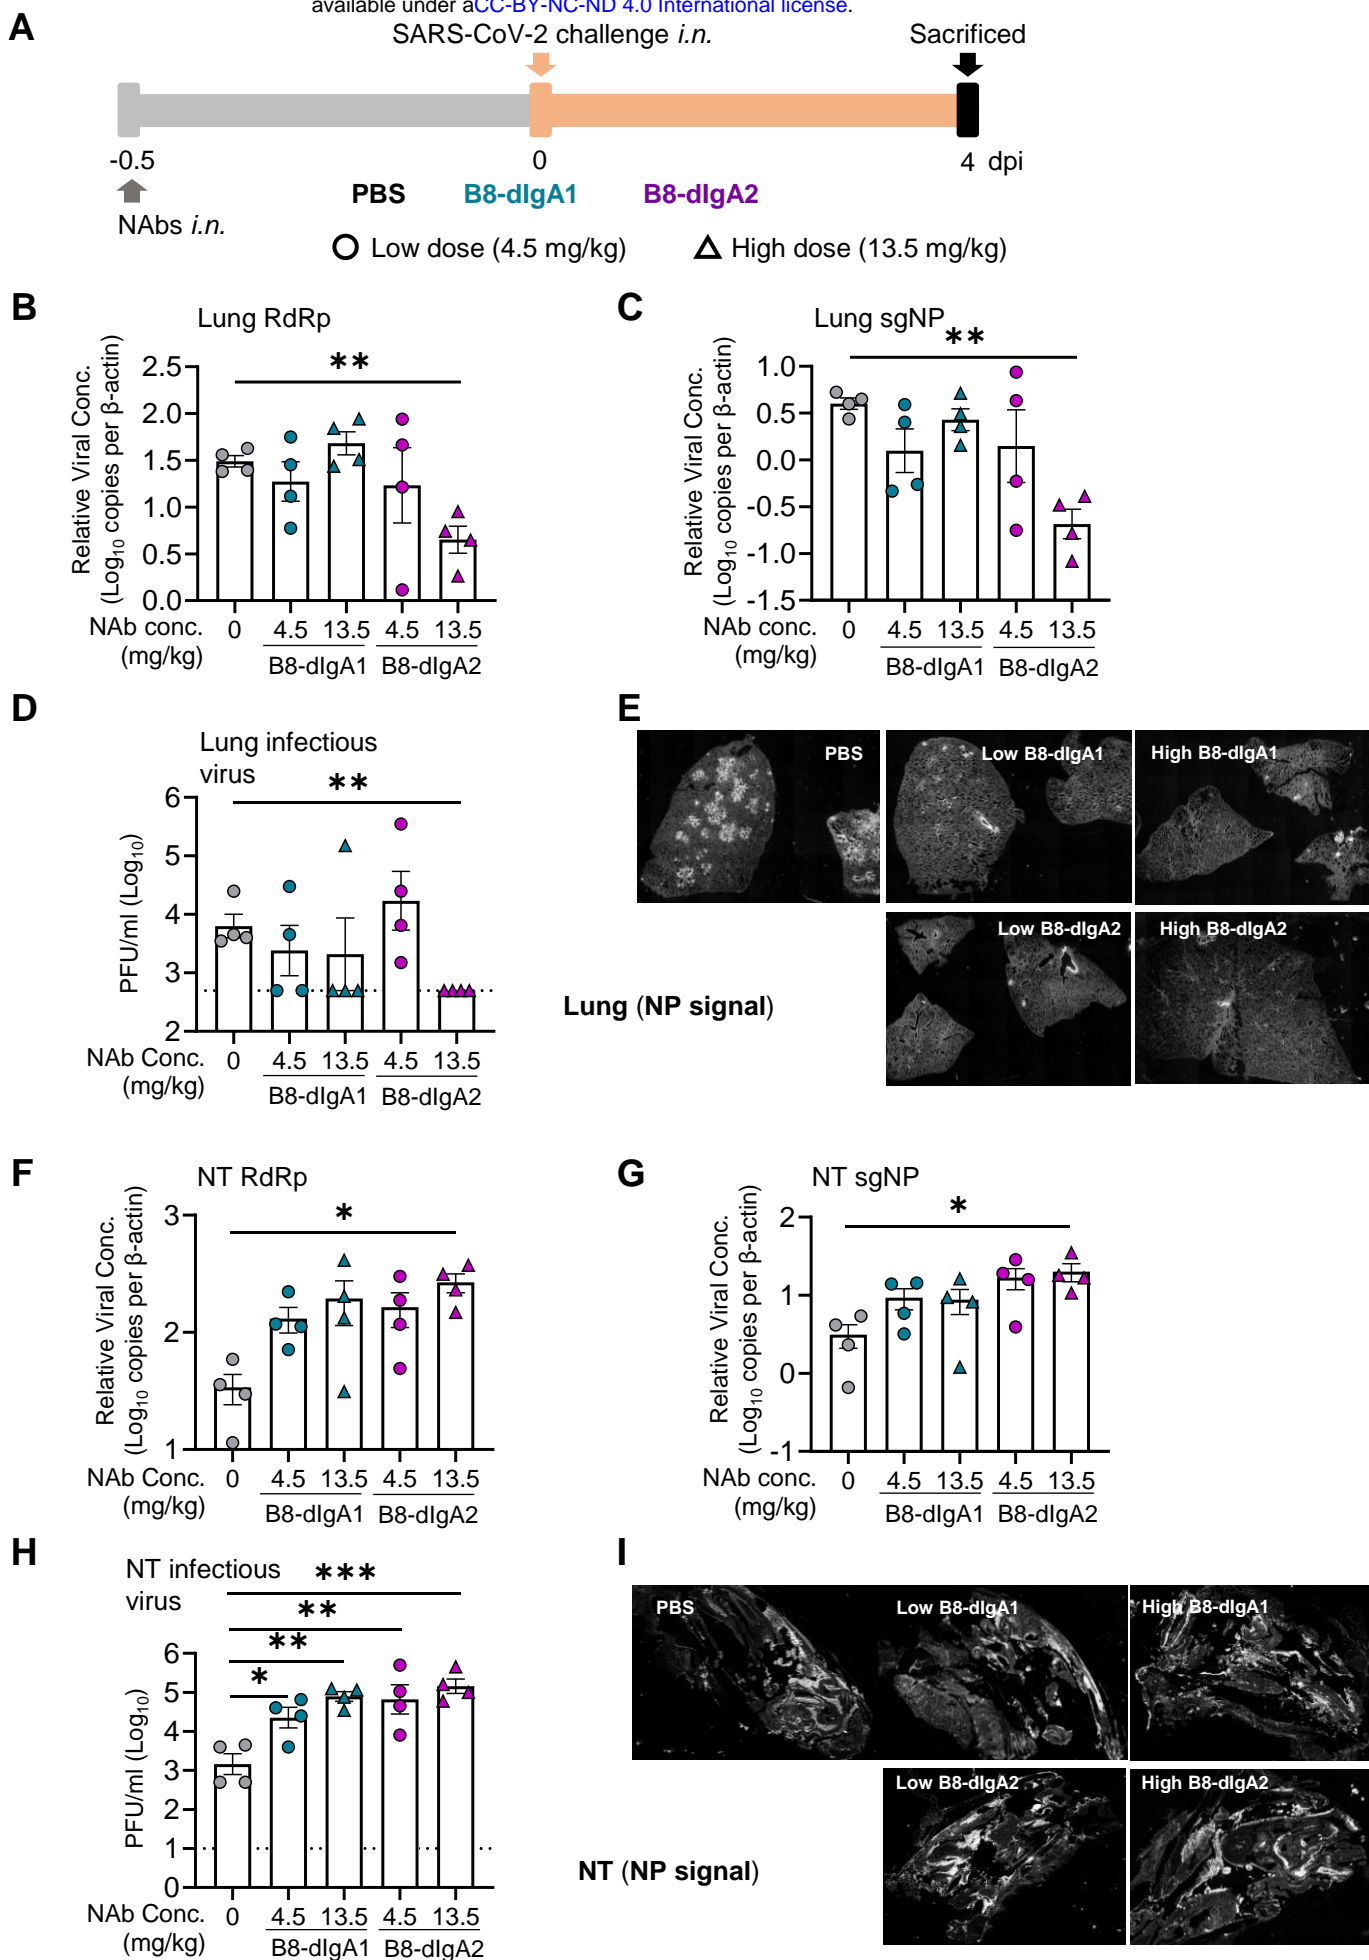



## Fig. 5

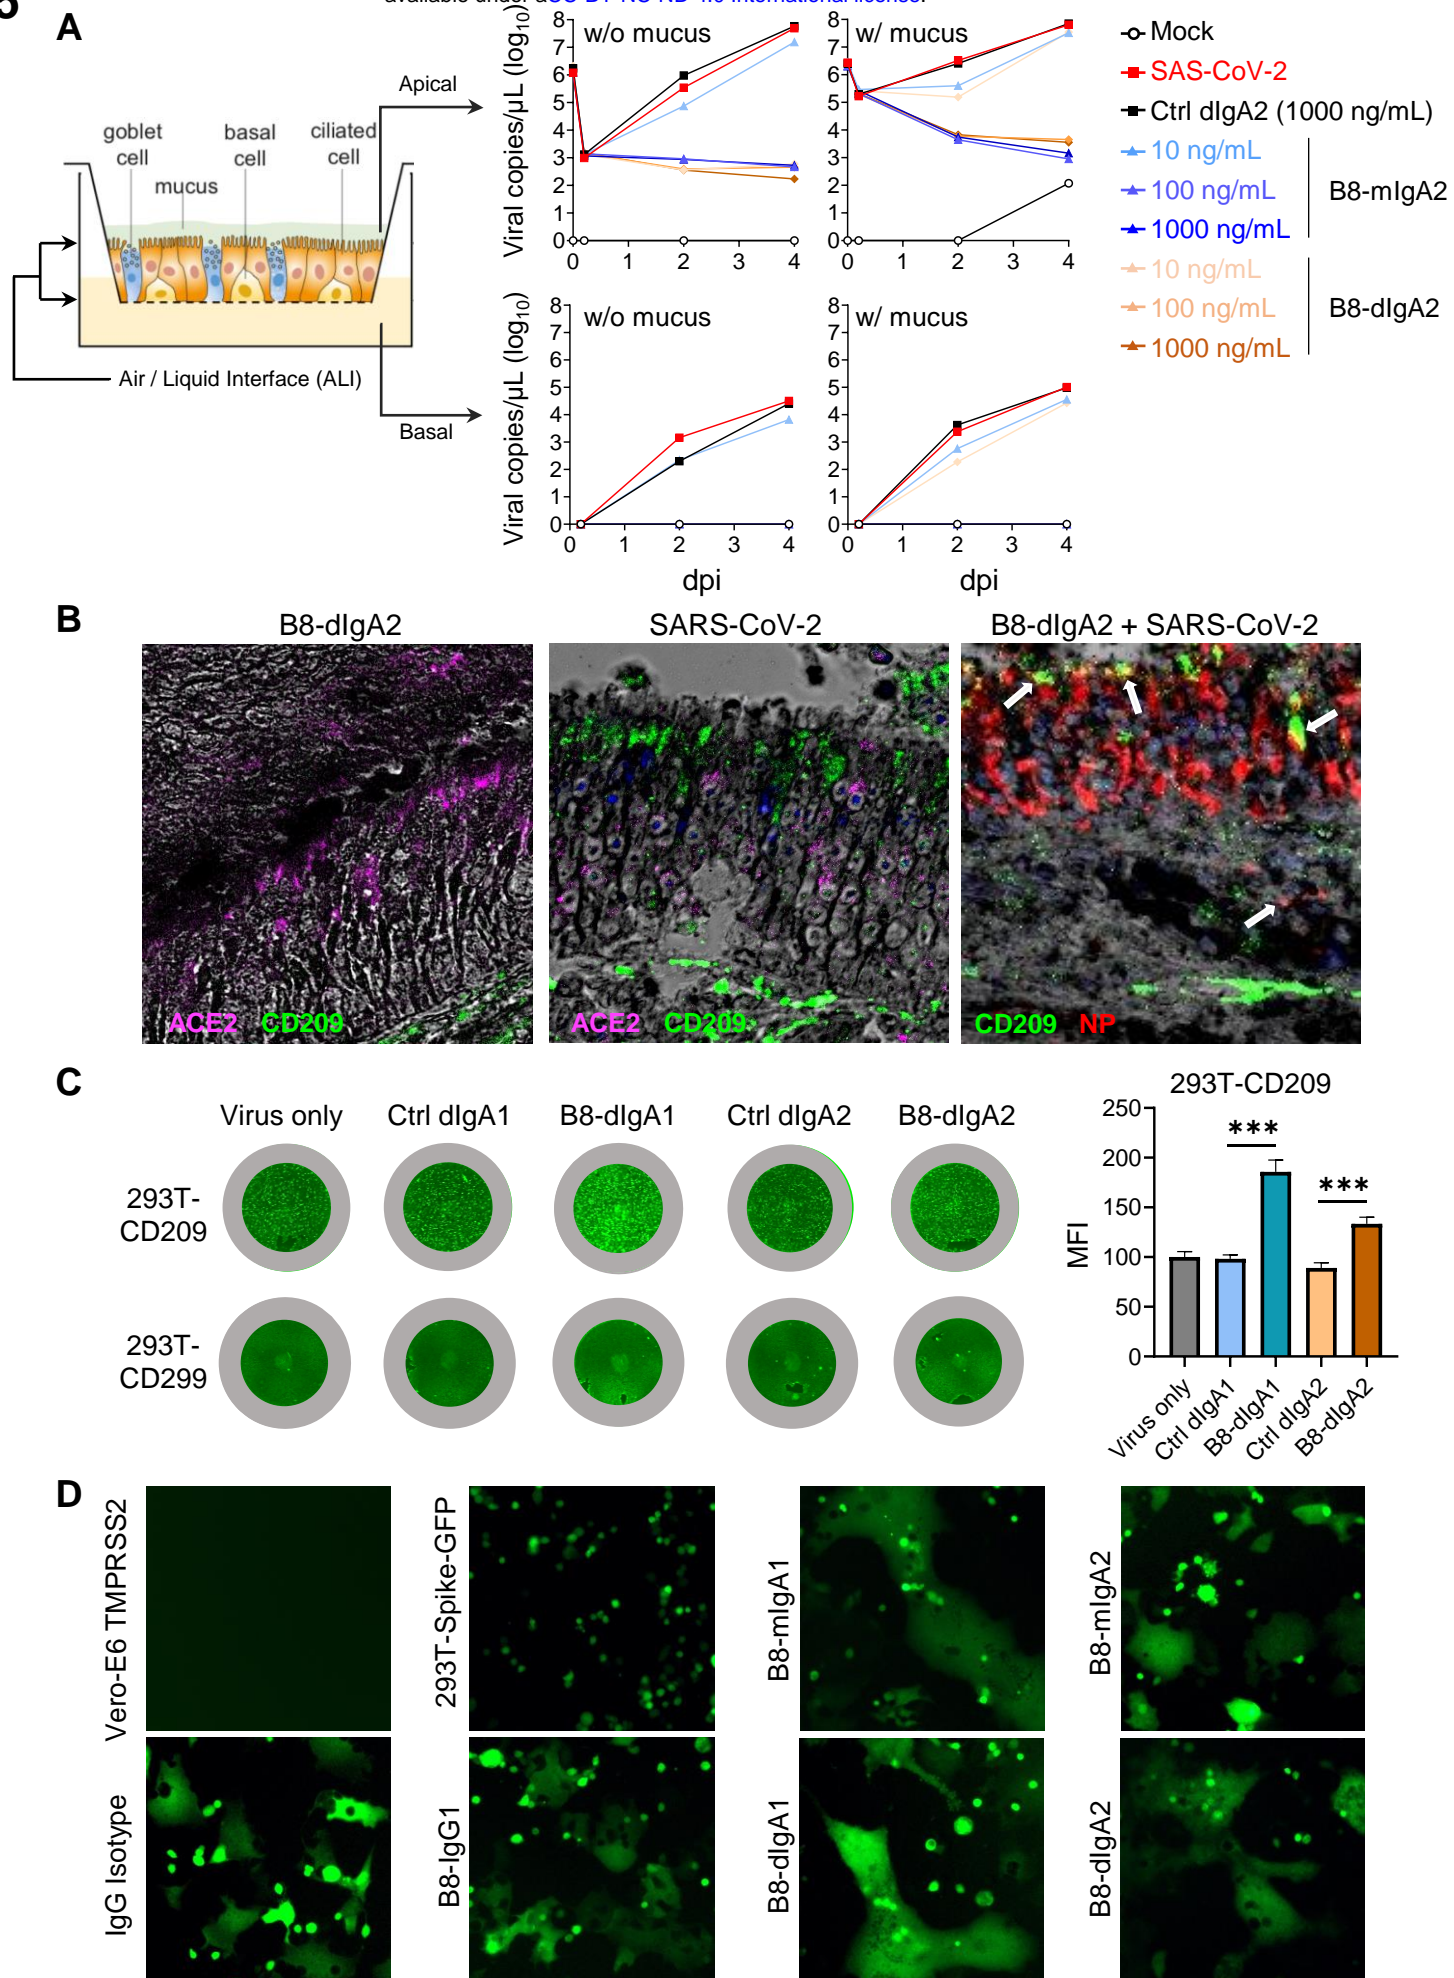

## Fig. 6

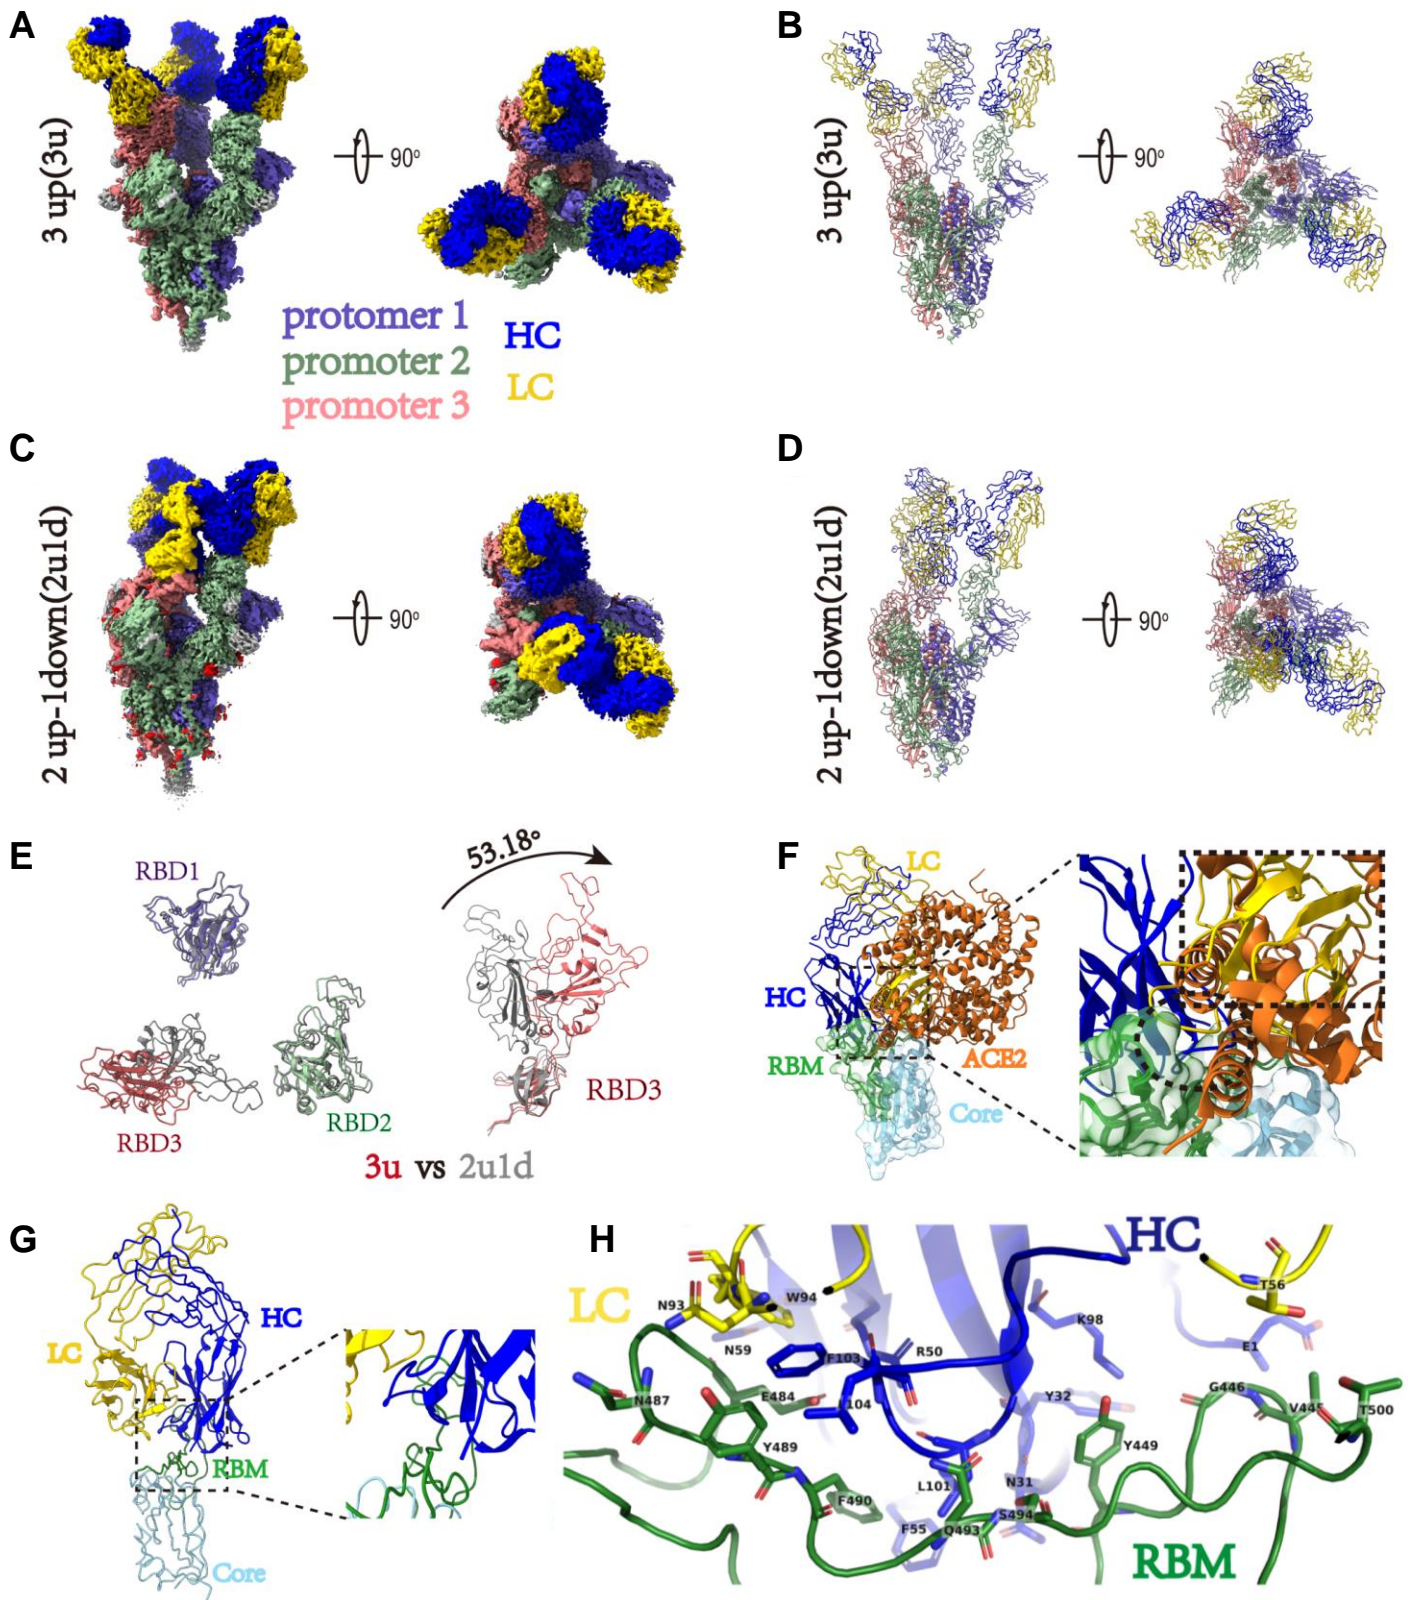

Source: https://www.biorxiv.org/content/biorxiv/early/2021/10/06/2021.10.05.463282.full.pdf
